# Supplementary material for: Synthesis and characterization of fullerene derivatives with perfluoroalkyl groups
Source: Royal Society of Chemistry journal article supplement (doi:10.1039/b823336e), 2009-01-01

**Title for the supplementary materials:**

Synthesis of intermediate, OFET character, <sup>1</sup>HNMR, <sup>13</sup>CNMR, <sup>19</sup>FNMR, and MS

**Supporting information**

**Synthesis and Characterization of Fullerene Derivatives with Perfluoroalkyl Groups**

**Xuemei Wang,<sup>a</sup> Yunlong Guo,<sup>b</sup> Yi Xiao,<sup>\*a</sup> Lei Zhang,<sup>b</sup> Gui Yu,<sup>\*,b</sup> and Yunqi Liu<sup>\*,b</sup>**

<sup>a</sup> State Key Laboratory of Fine Chemicals, Dalian University of Technology,

Dalian 116012, China. E-Mail: [xiaoyi@chem.dlut.edu.cn](mailto:xiaoyi@chem.dlut.edu.cn)

<sup>b</sup> Beijing National Laboratory for Molecular Sciences, Institute of Chemistry, Chinese Academy of Sciences,

Beijing 100190, China. E-Mail: [yugui@iccas.ac.cn](mailto:yugui@iccas.ac.cn); [liuyq@iccas.ac.cn](mailto:liuyq@iccas.ac.cn)

**3a and 3b**

According to general procedure<sup>1</sup>, the mixture of acetic acid (80 mL) and acetic anhydride (40 mL) was added iodide (15.24 g, 60 mmol) at 0 °C and then chromium trioxide (6 g, 60 mmol) was added after 10 min. Half an hour later, sulfuric acid (10 mL) was added dropwisely with half an hour to keep the reaction temperature below 0 °C. The benzophenone (8.3 g, 50 mmol) was poured into the reaction mixture and was stirred at ambient temperature for 7 h which was followed by stirring at 70 °C for 3 h. The reaction mixture was poured into sodium sulfite solution with 15 g of sodium sulfite and was stirred for a moment. The solution was poured into ice and was extracted with dichloromethane. The organic layer was dried over MgSO<sub>4</sub>. Purification was accomplished by column chromatography on silica gel with petroleum ether: dichloromethane = 1:1, providing **3a** (6.93 g; 45%; mp: 38 – 40 °C) and **3b** (8.68 g; 40%; mp: 138- 140 °C).

<sup>1</sup>(1) Lulinski ;Piotr; Skulski, *Lech. Bull. Chem. Soc. Jpn.*; EN; 70, 7,1997,1665 – 1670.

**Fabrication and characteristics of organic thin film transistors**

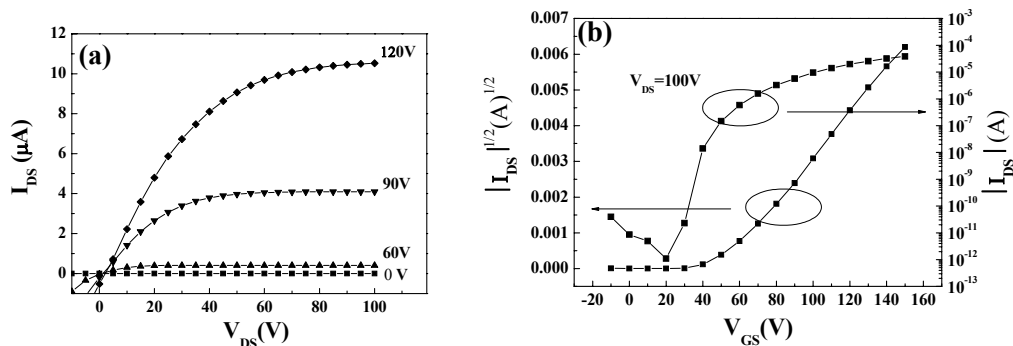

**Figure S1.** (a) Output and (b) transfer characteristics of the **1**-based OFETs fabricated under substrate temperature of 25 °C.

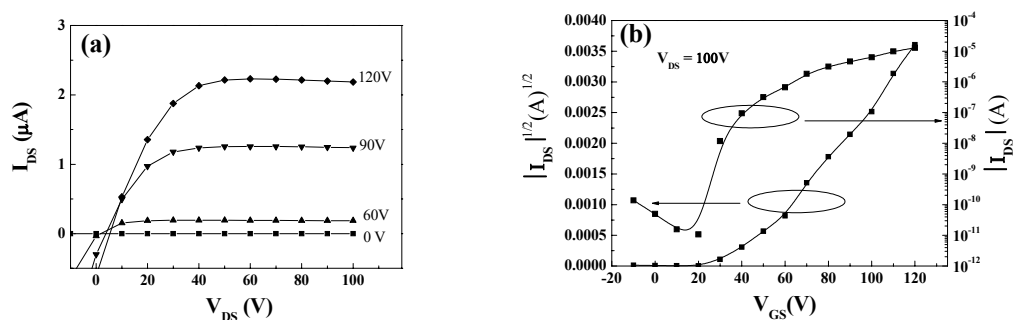

**Figure S2.** (a) Output and (b) transfer characteristics of the **2**-based OFETs fabricated under substrate temperature of 25 °C.

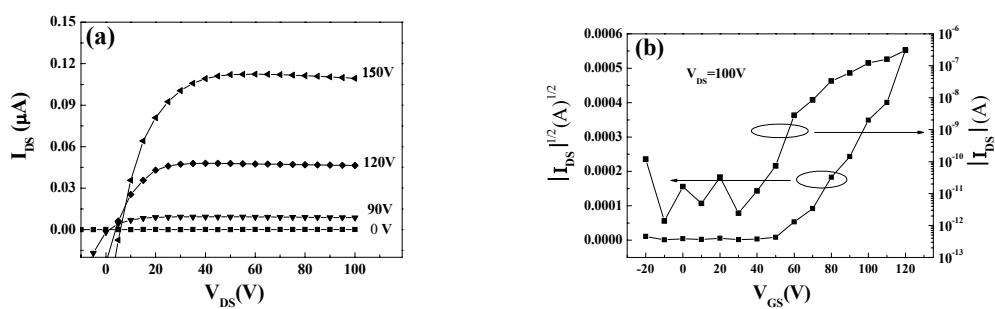

**Figure S3.** (a) Output and (b) transfer characteristics of the 2-based OFETs fabricated under substrate temperature of 100 °C.

<sup>1</sup>H NMR Spectra of Compound **4b**

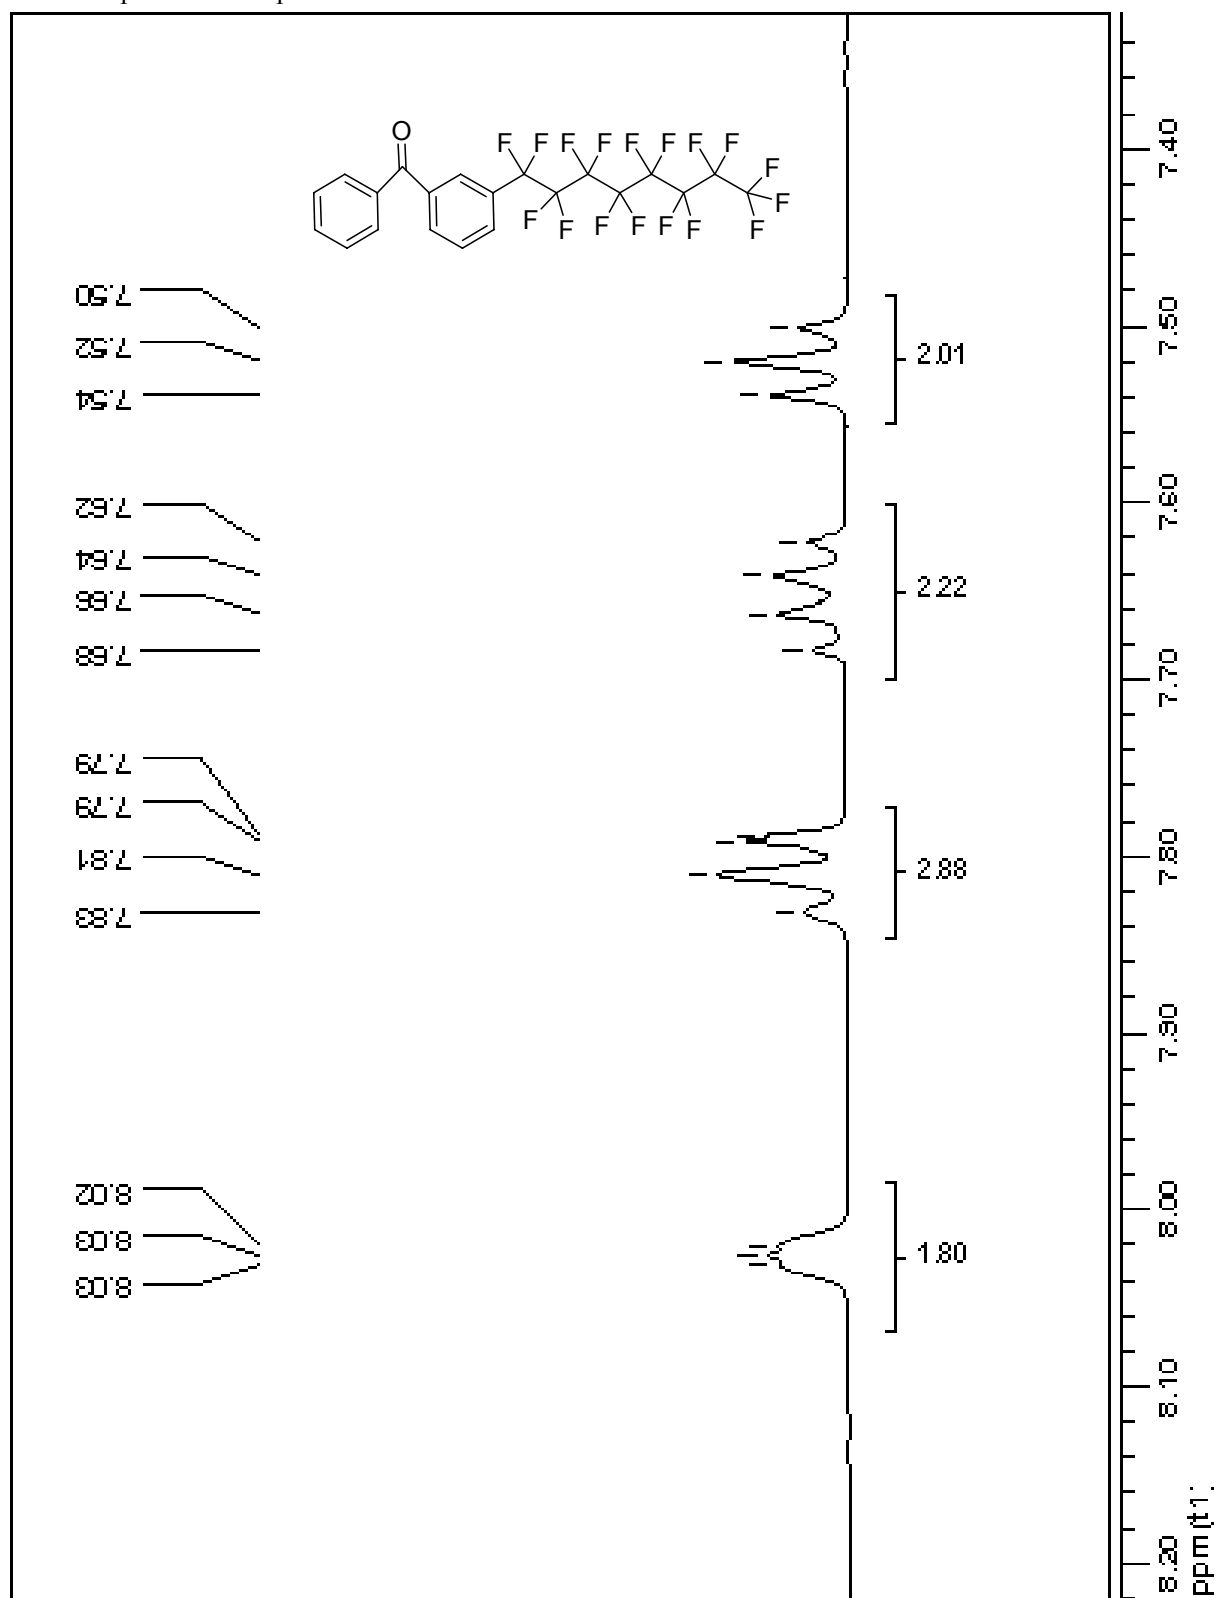

<sup>13</sup>CNMR Spectra of Compound **4b**

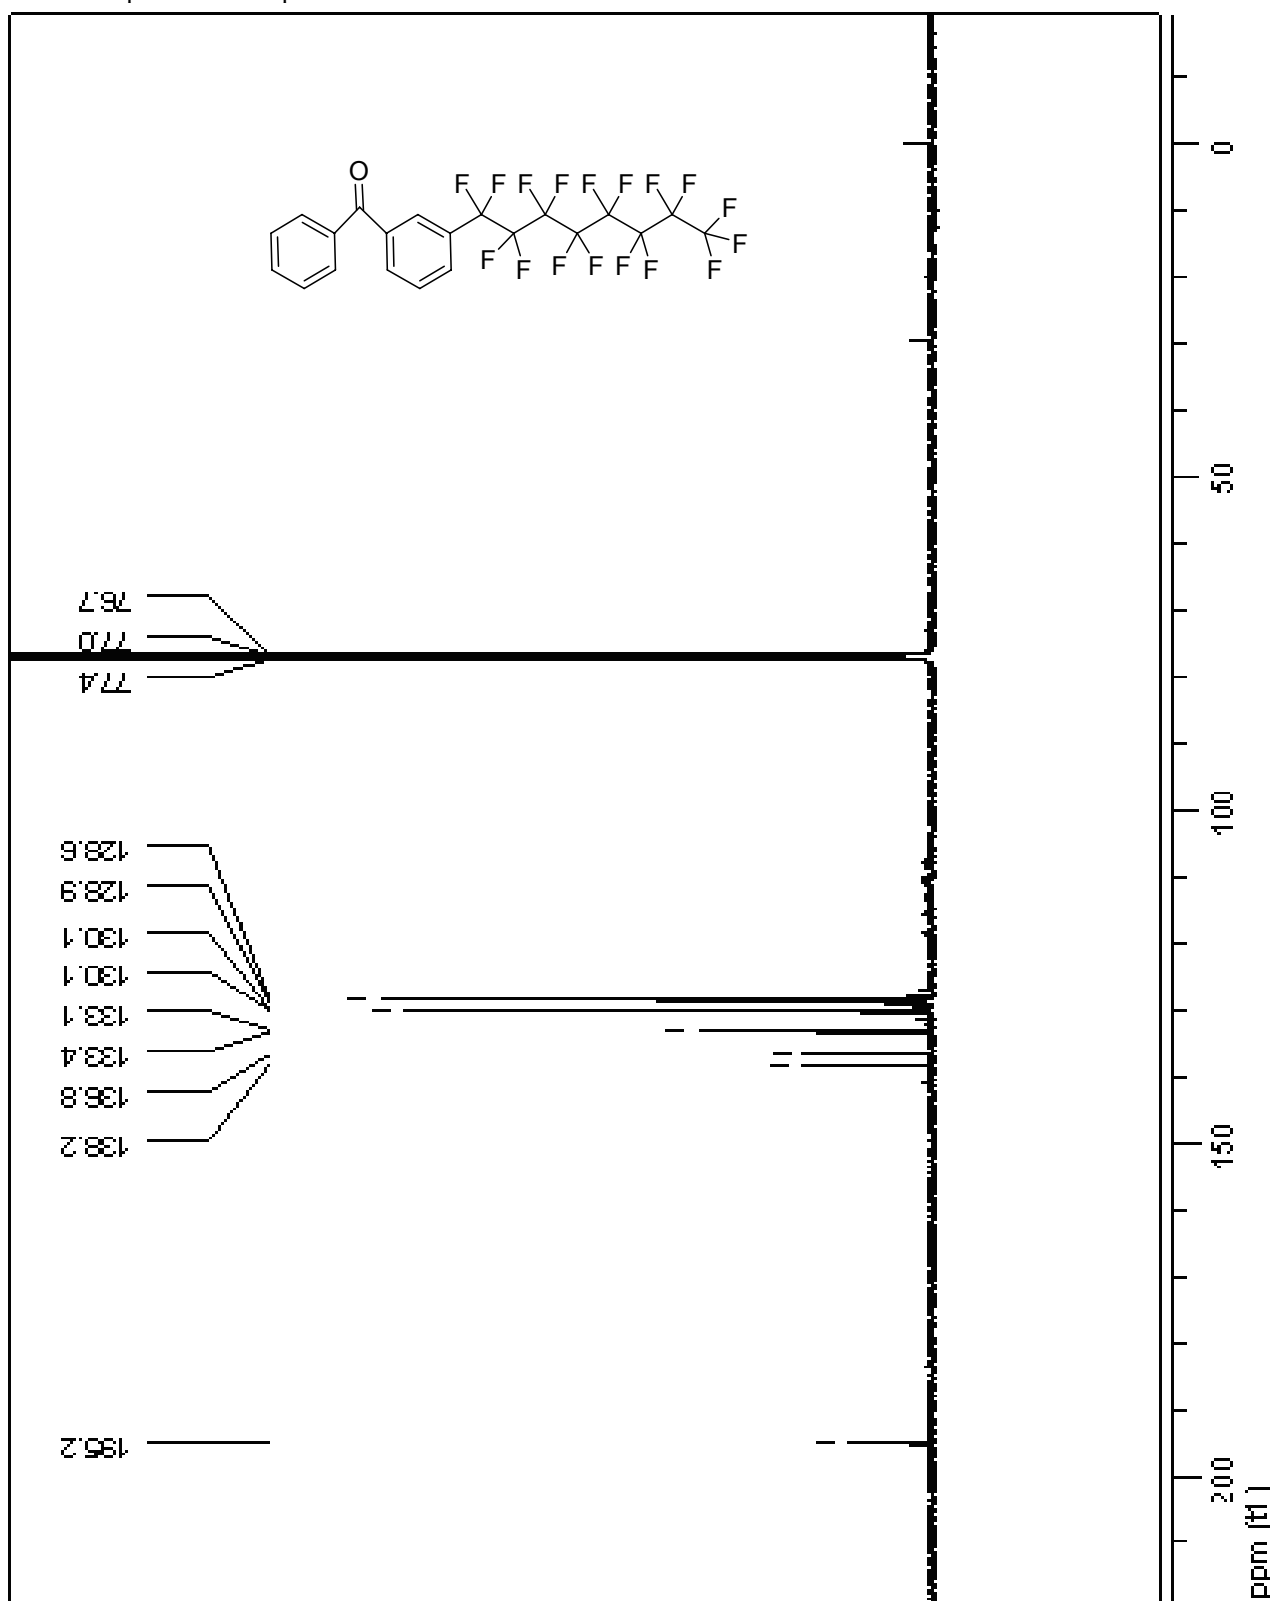



<sup>1</sup>H NMR Spectra of Compound 4a

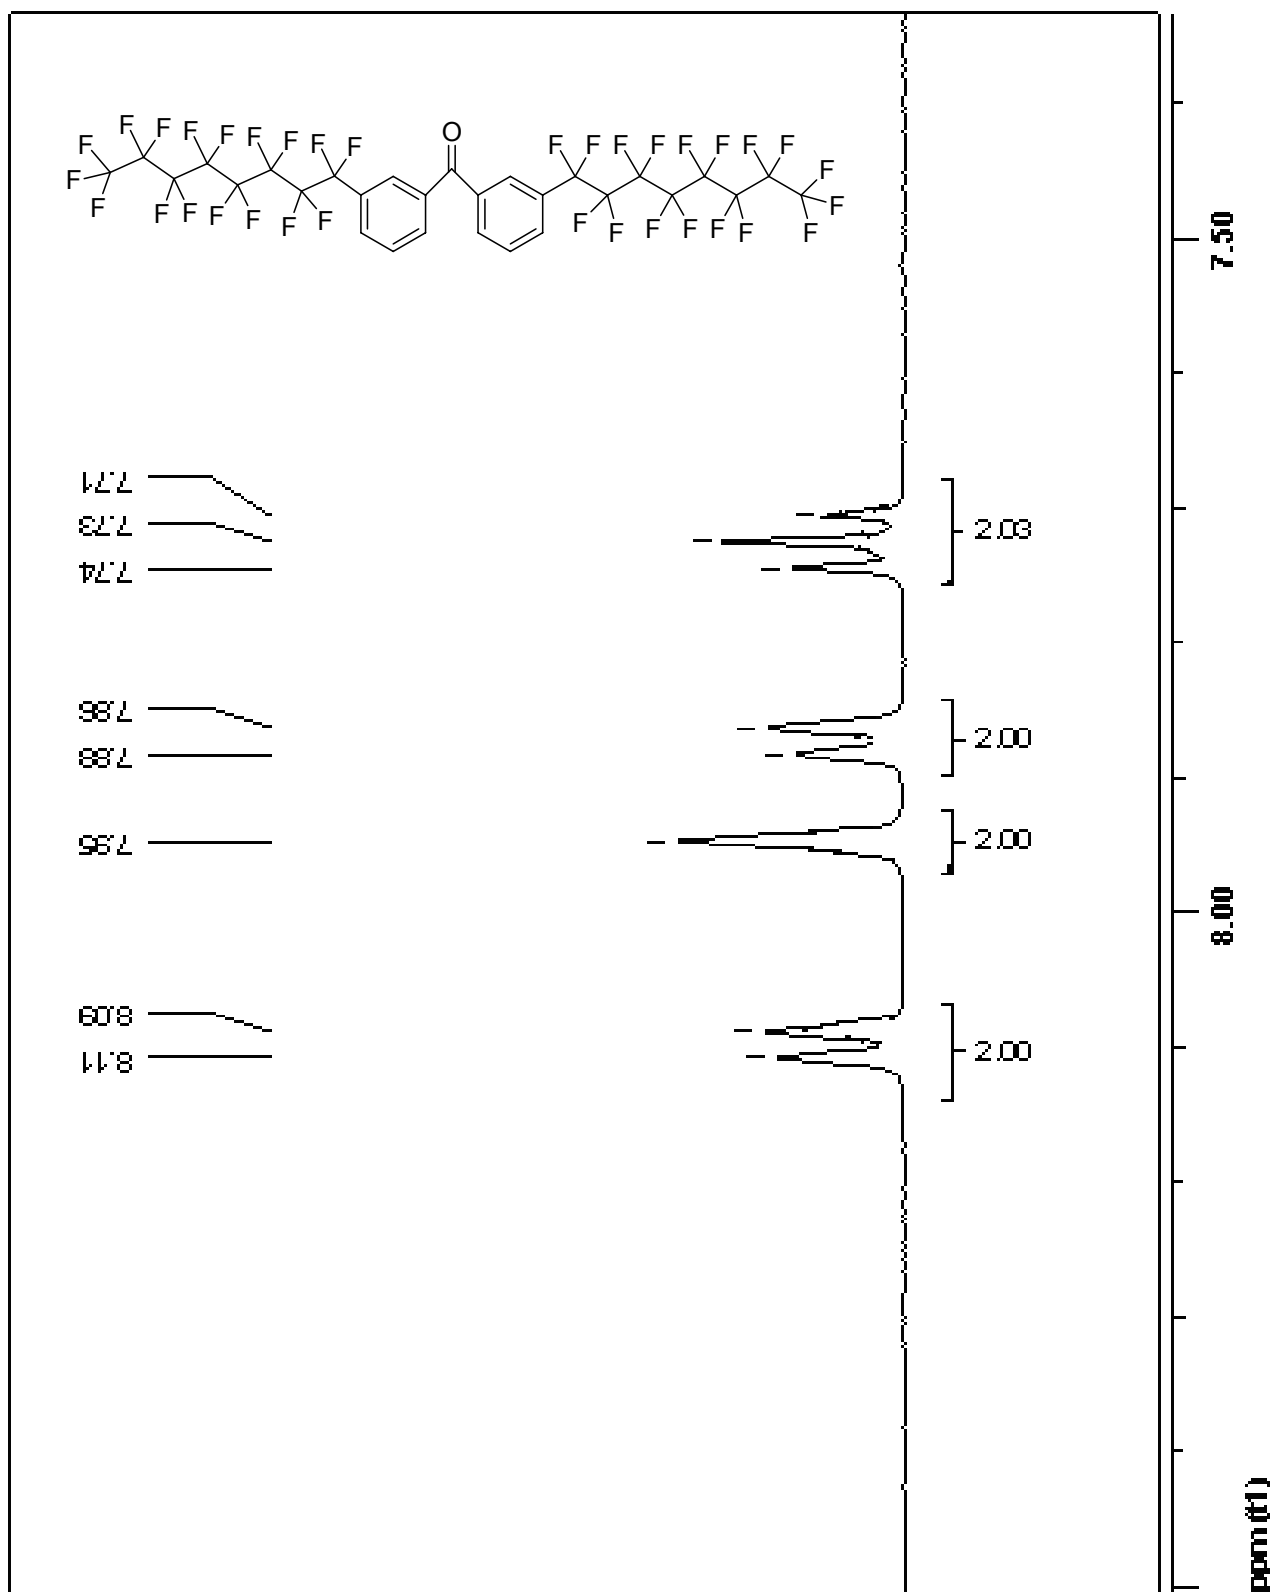

<sup>13</sup>CNMR Spectra of Compound **4a**

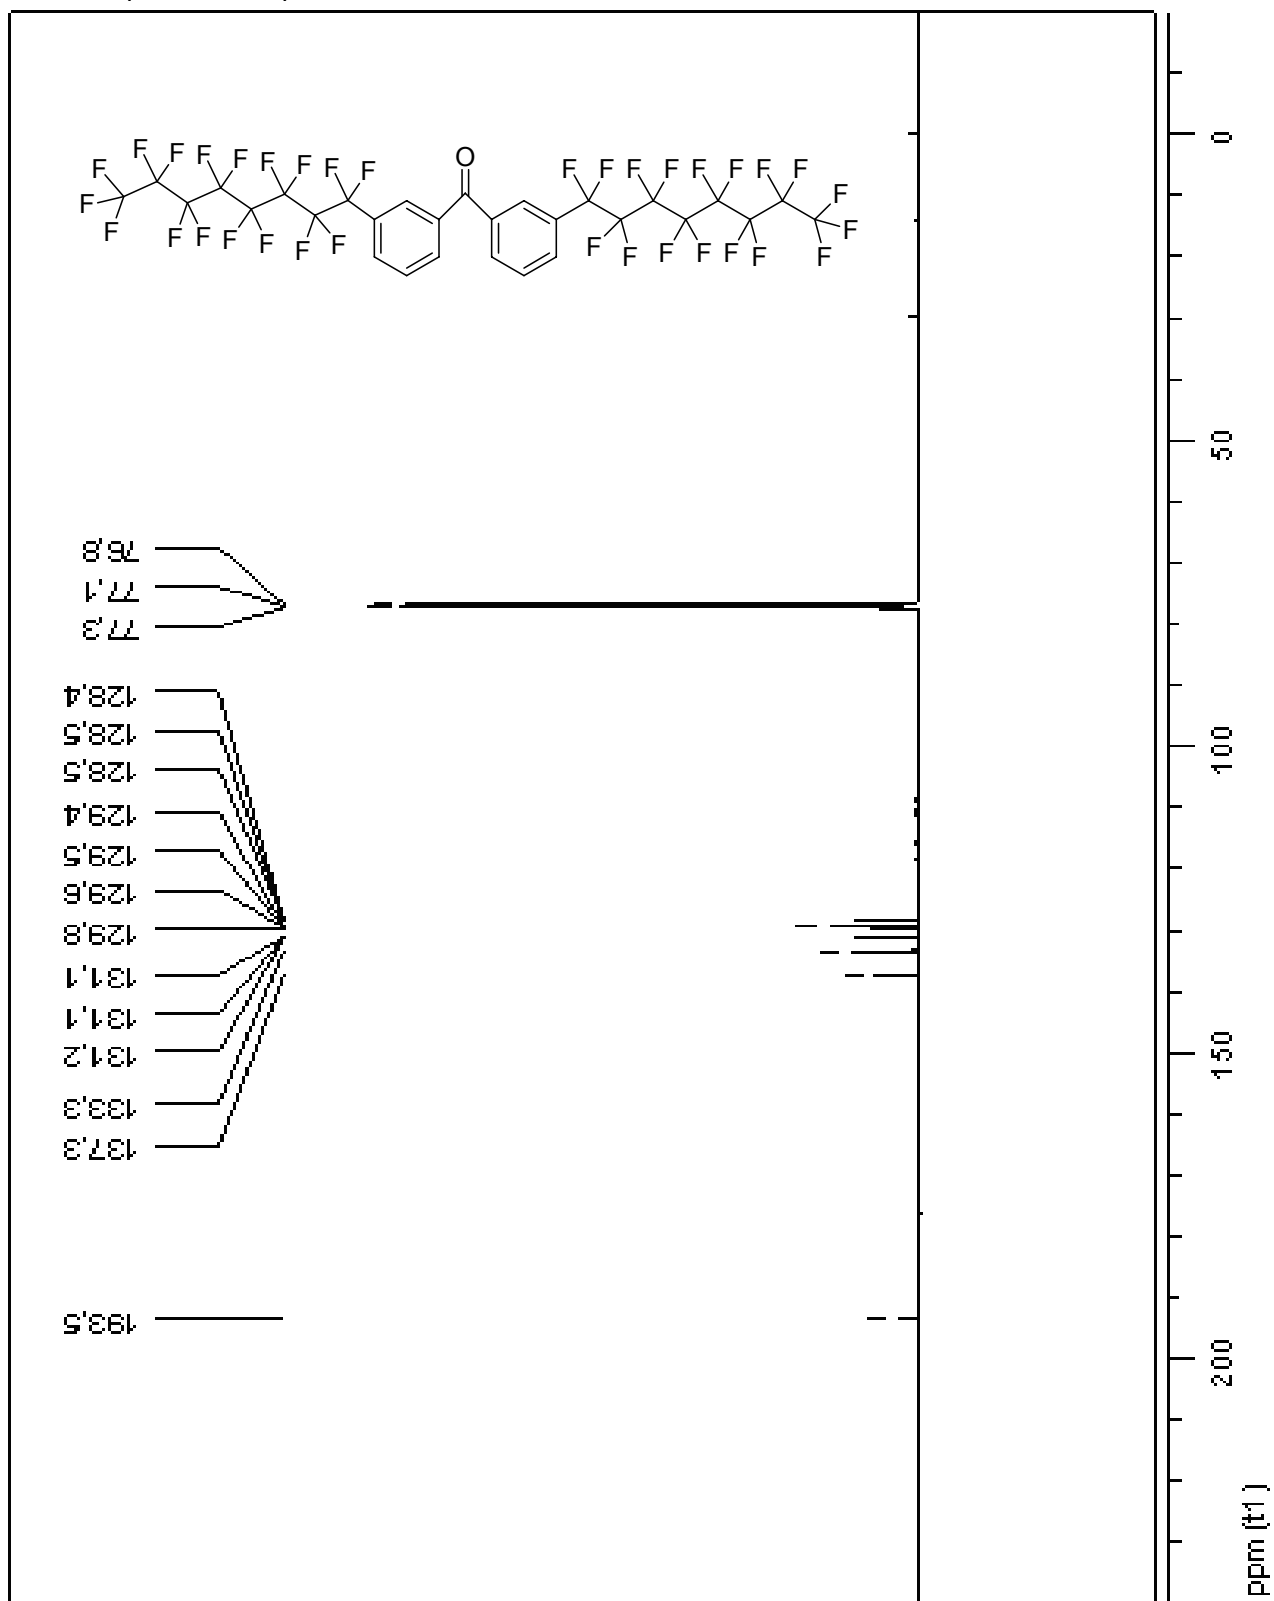

<sup>19</sup>F NMR Spectra of Compound 4a

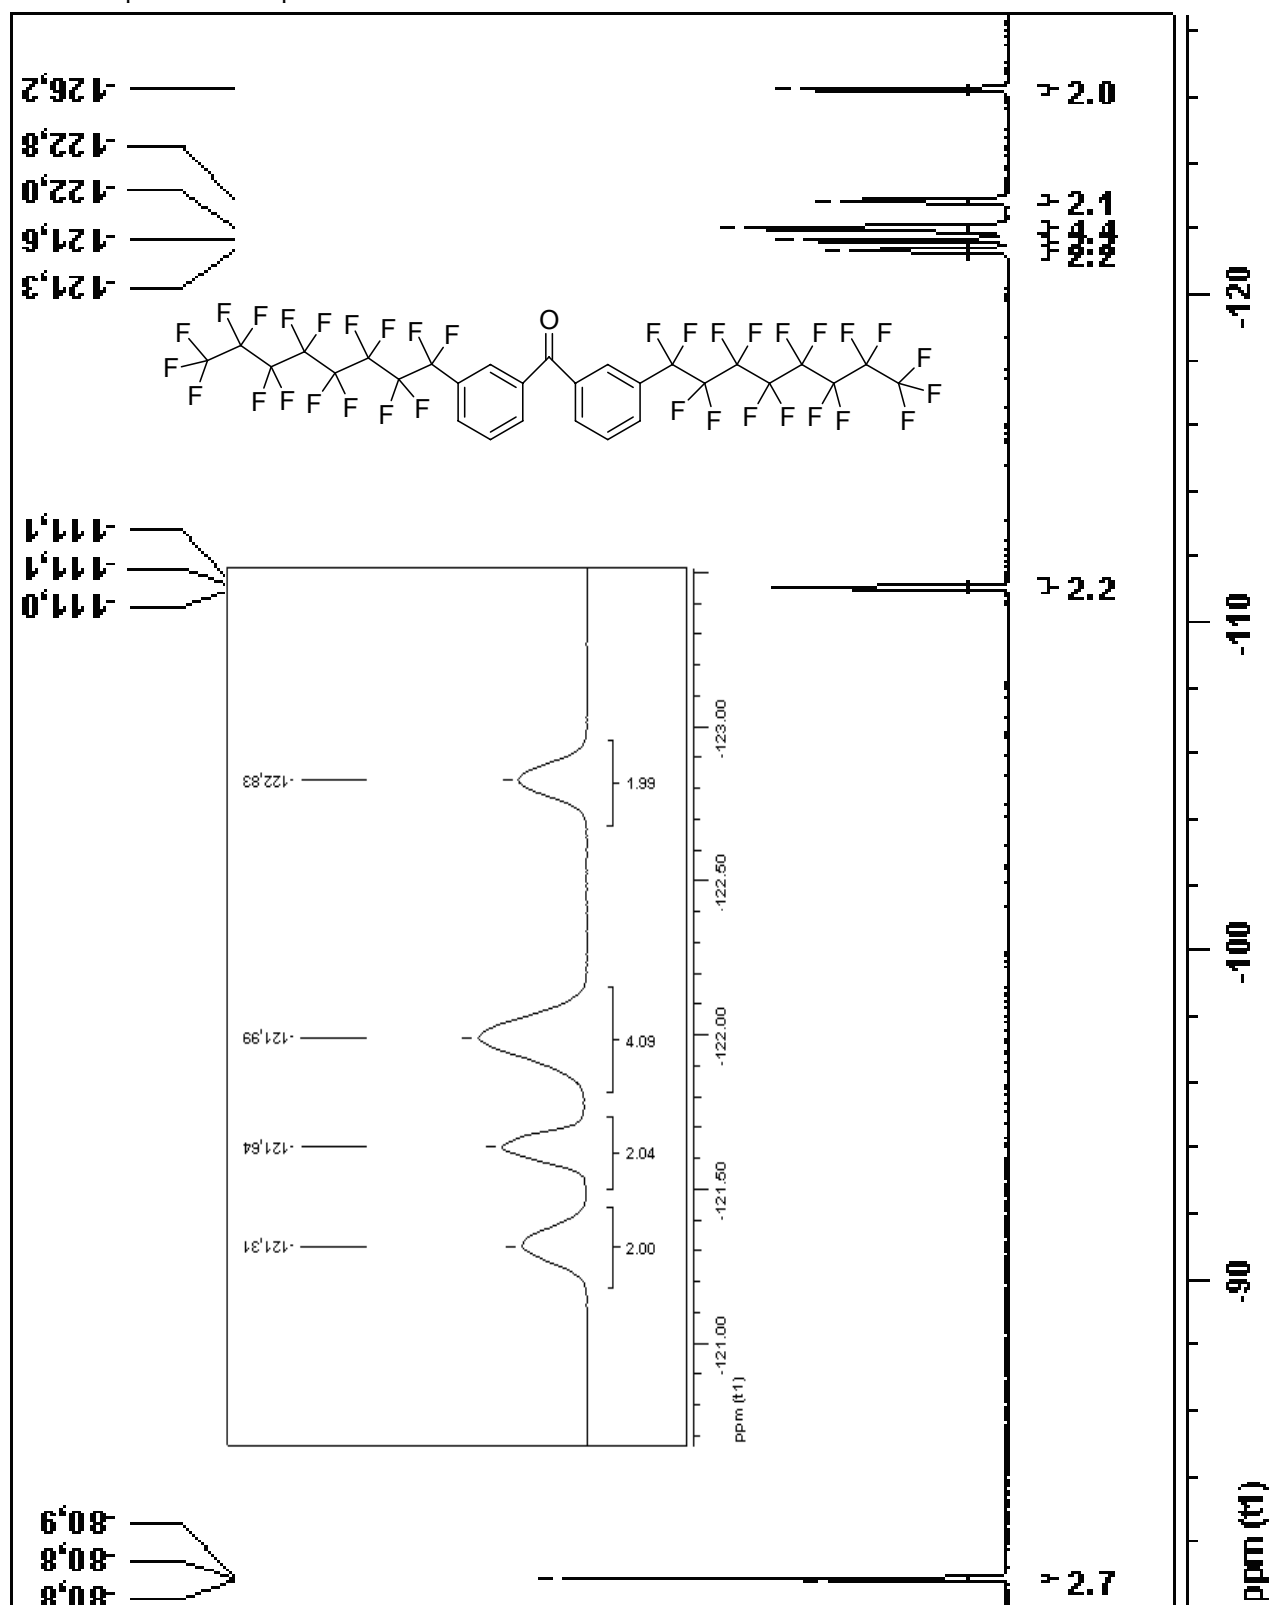



<sup>1</sup>H NMR Spectra of Compound **5b**

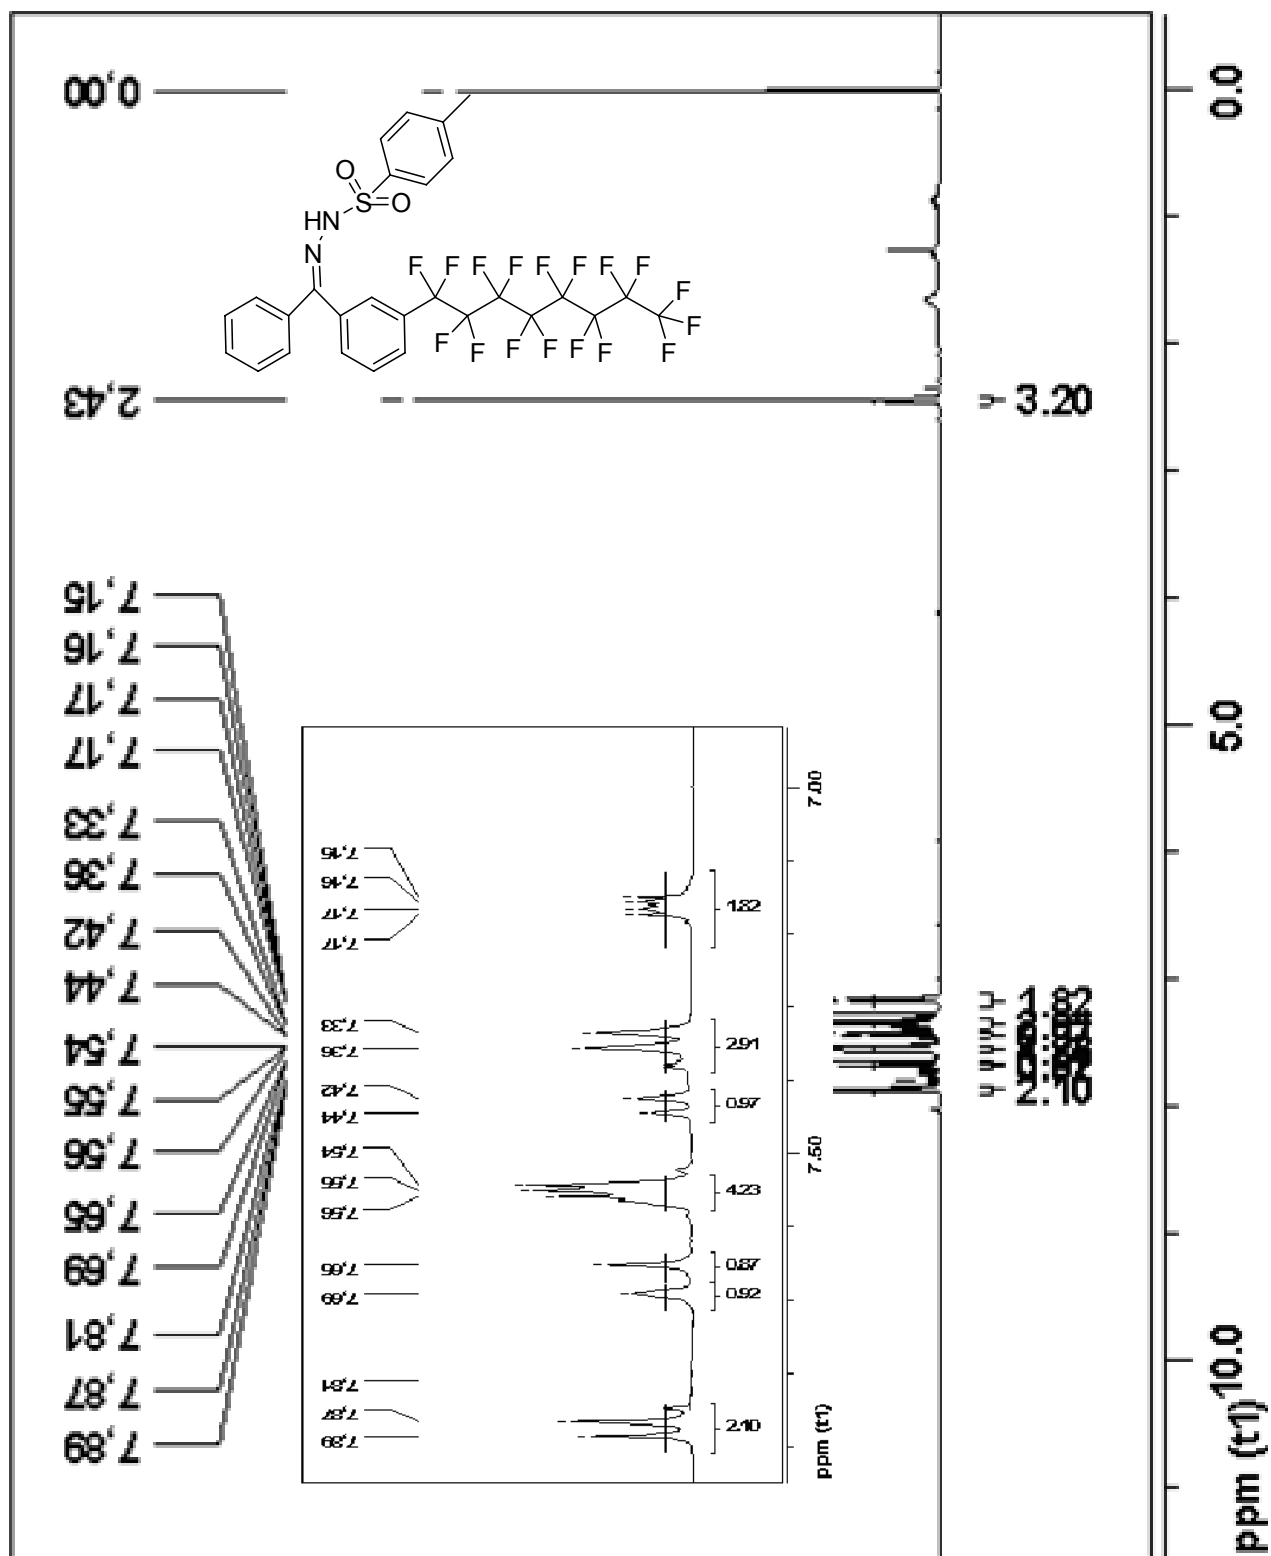

<sup>13</sup>CNMR Spectra of Compound **5b**

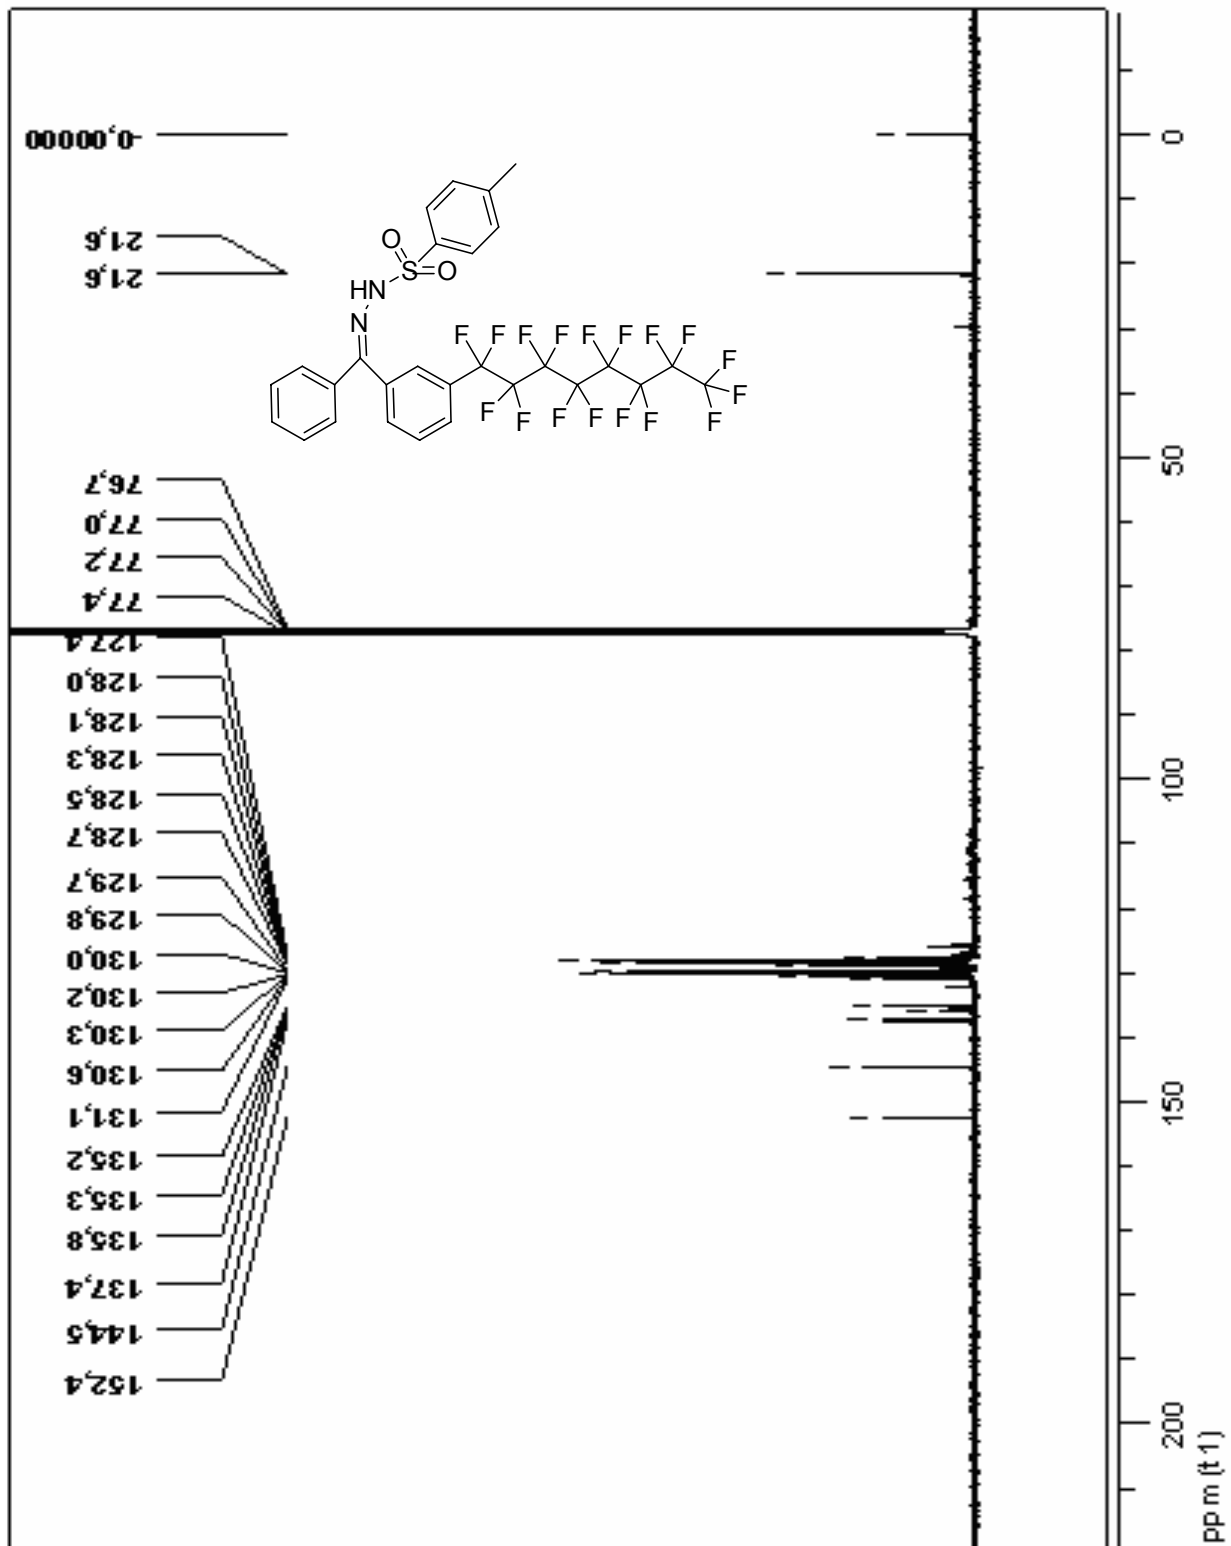

<sup>19</sup>F NMR Spectra of Compound **5b**

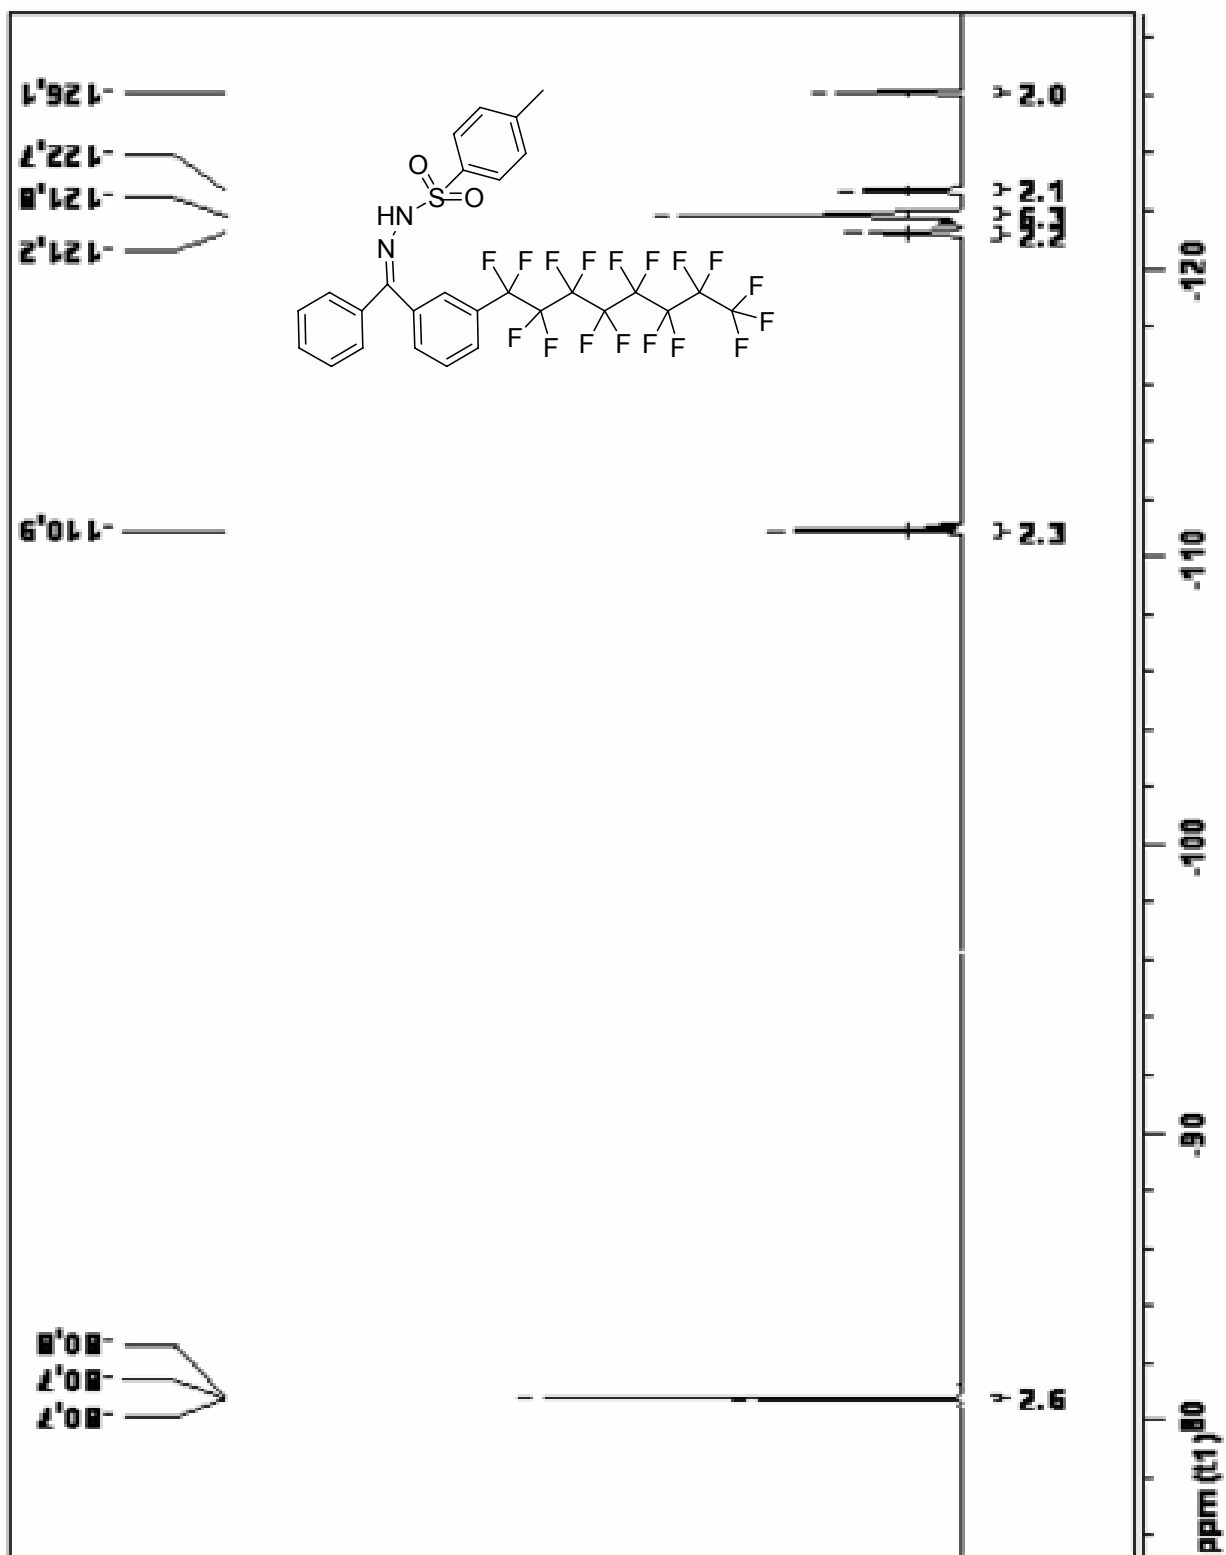

<sup>1</sup>H NMR Spectra of Compound 5a

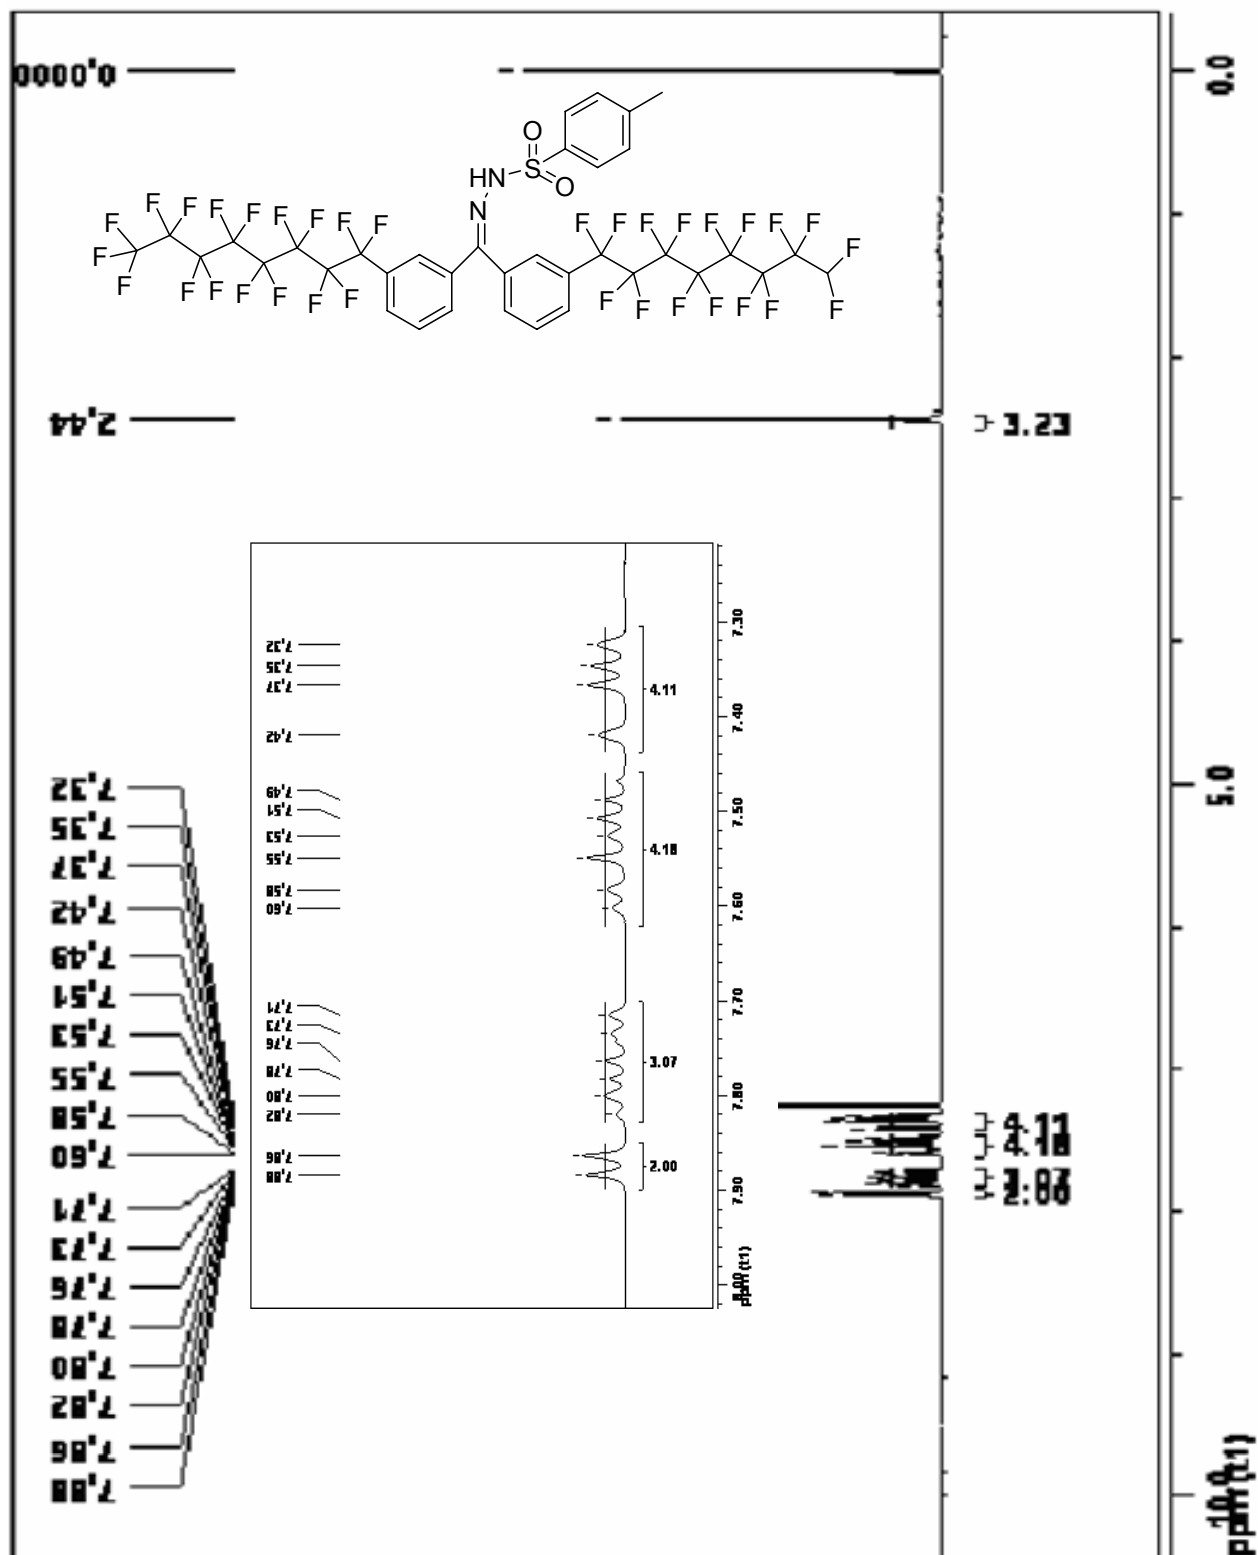

<sup>13</sup>CNMR Spectra of Compound 5a

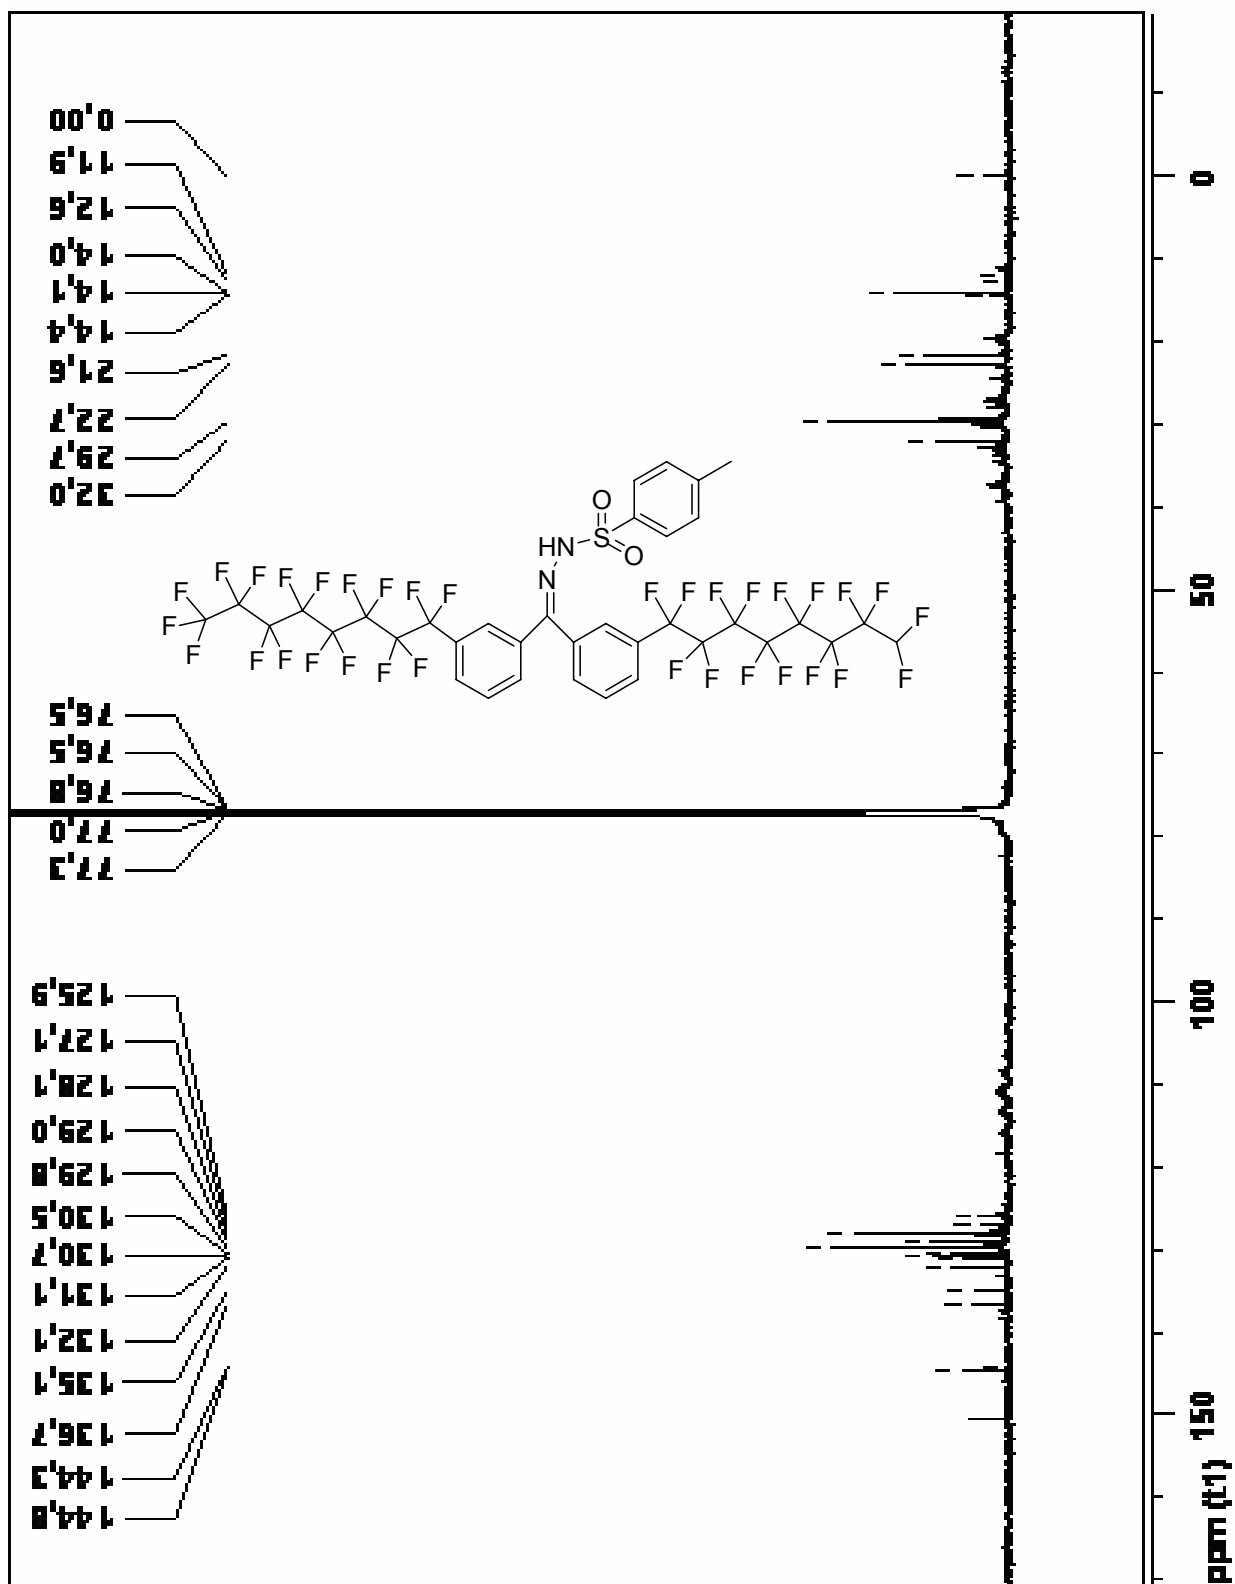

$^1\text{H}$ NMR Spectra of Compound 1

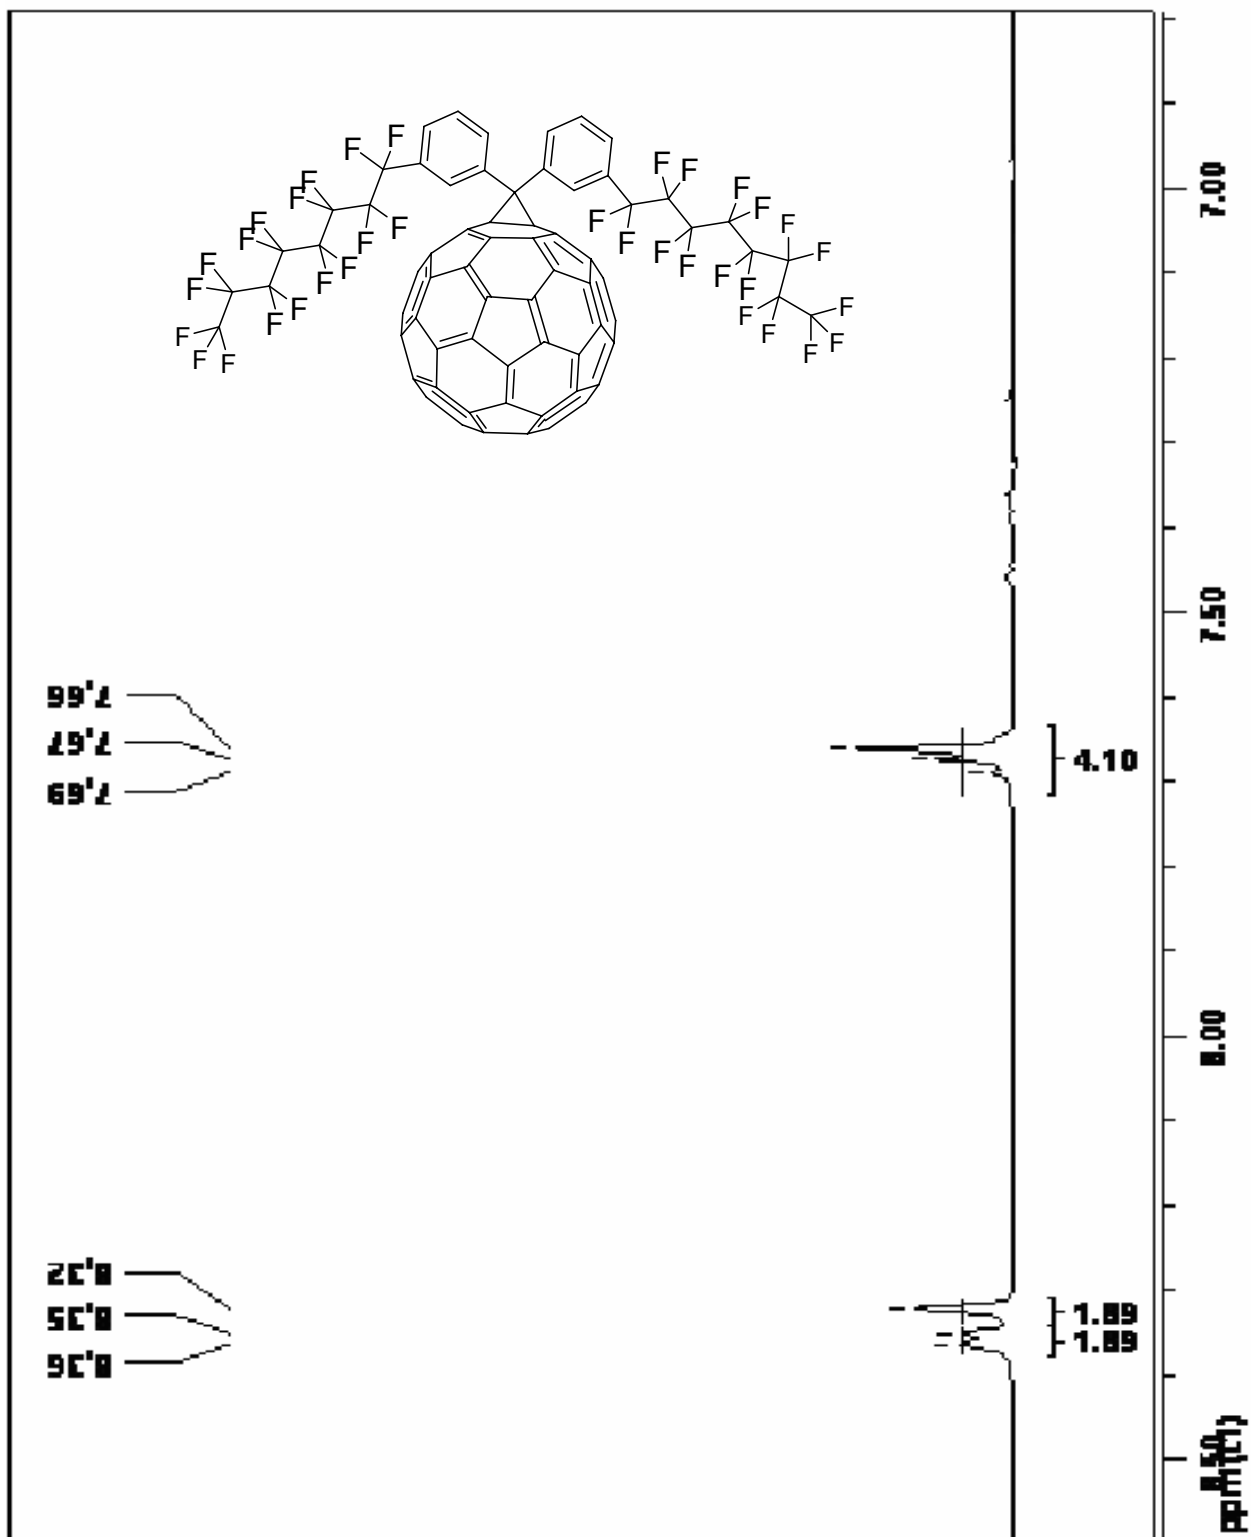

<sup>13</sup>CNMR Spectra of Compound 1

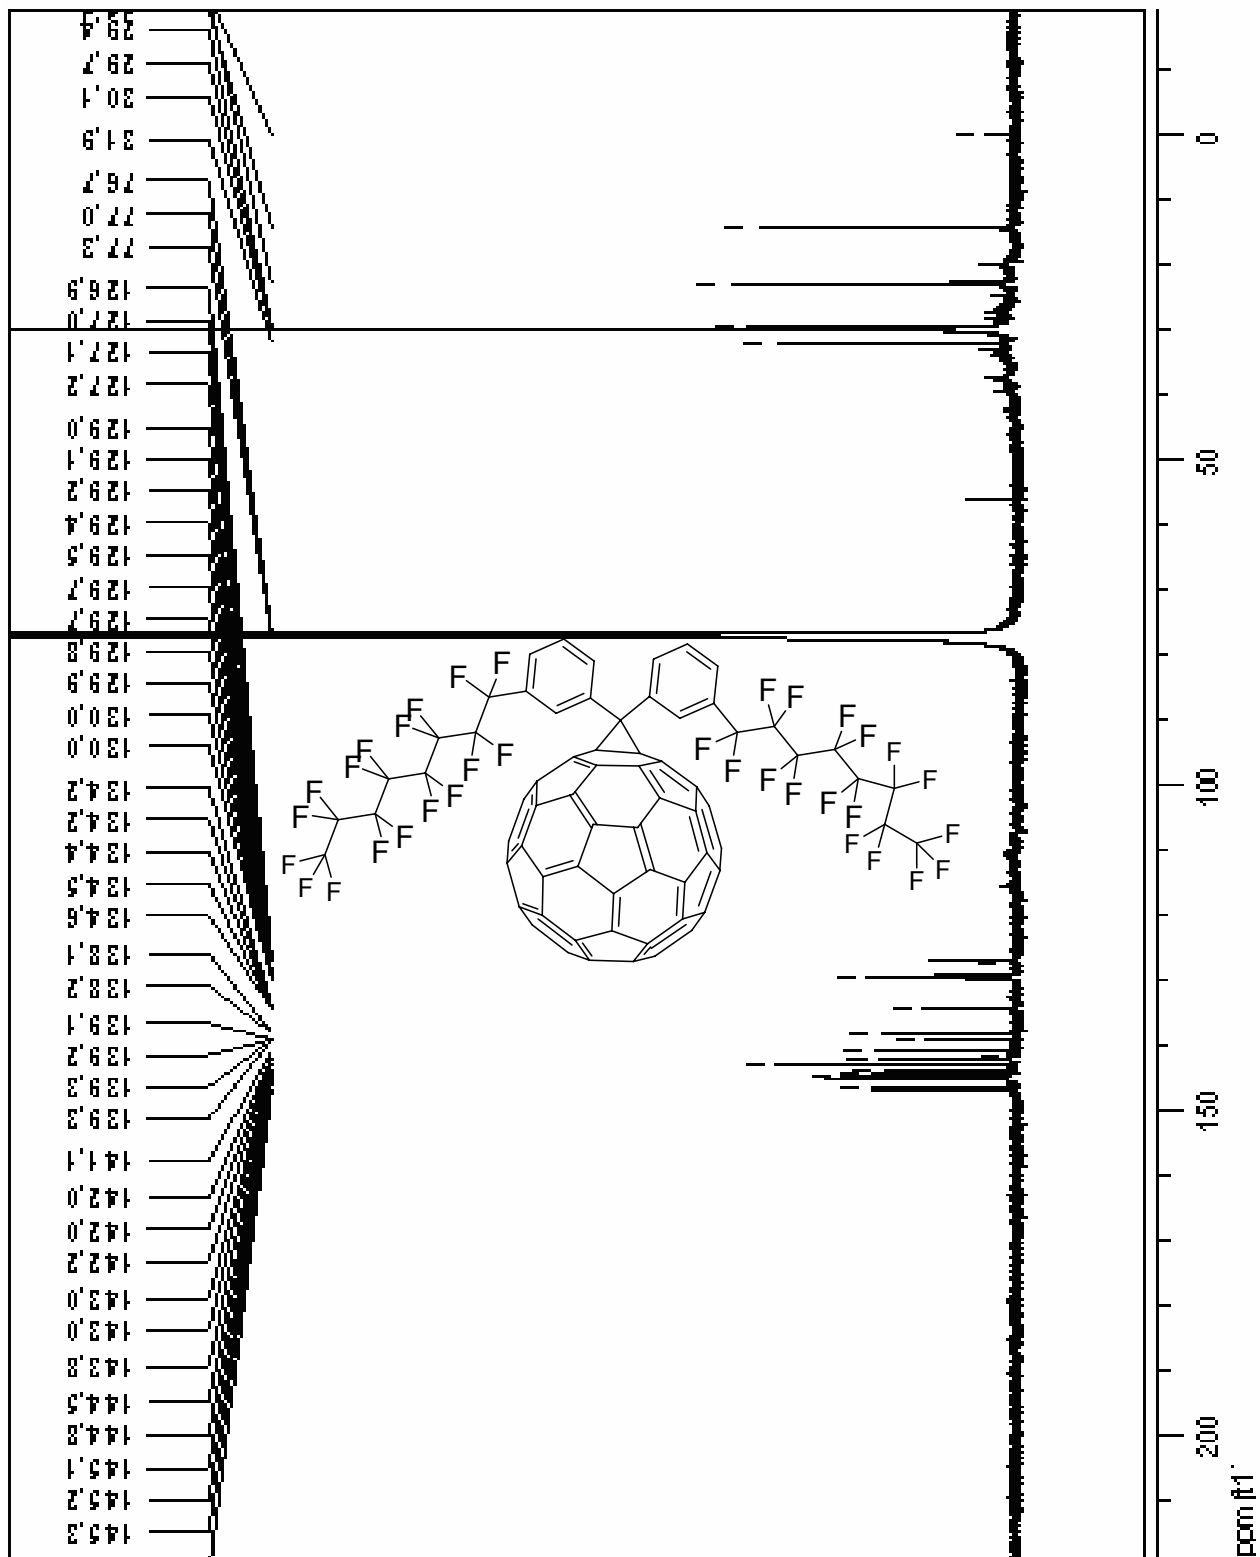

<sup>19</sup>F NMR Spectra of Compound 1

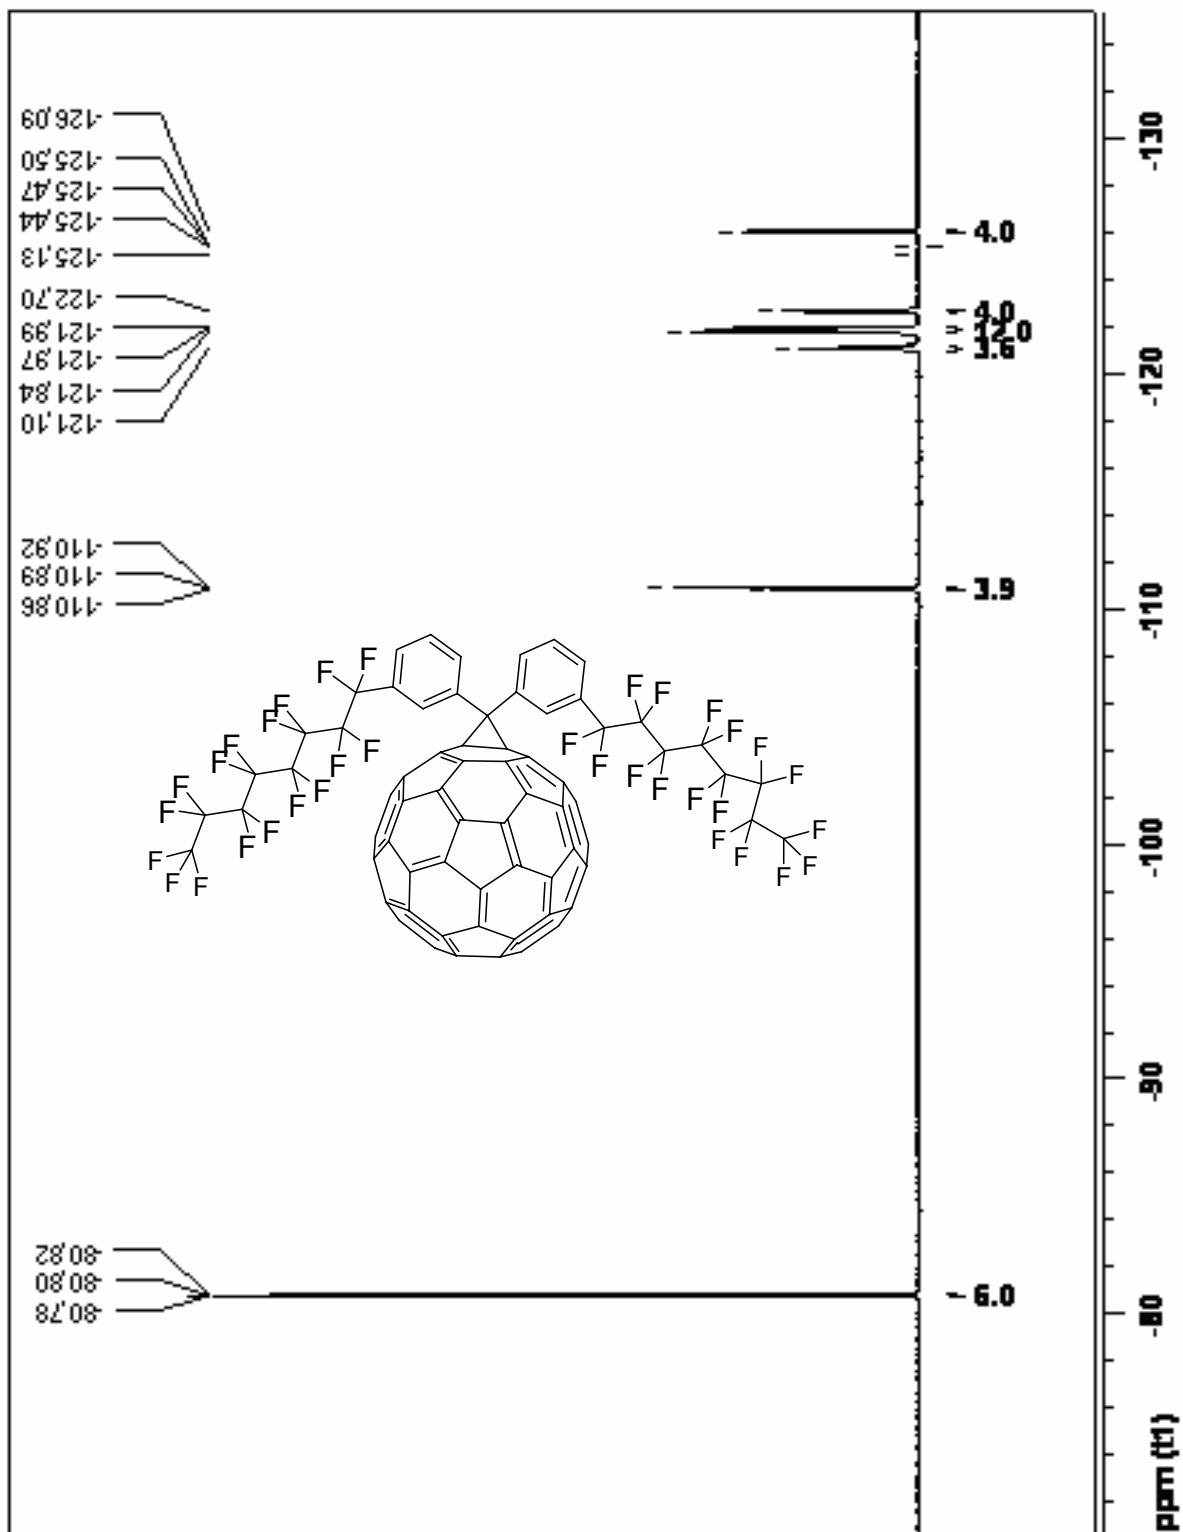



<sup>1</sup>H NMR Spectra of Compound 2

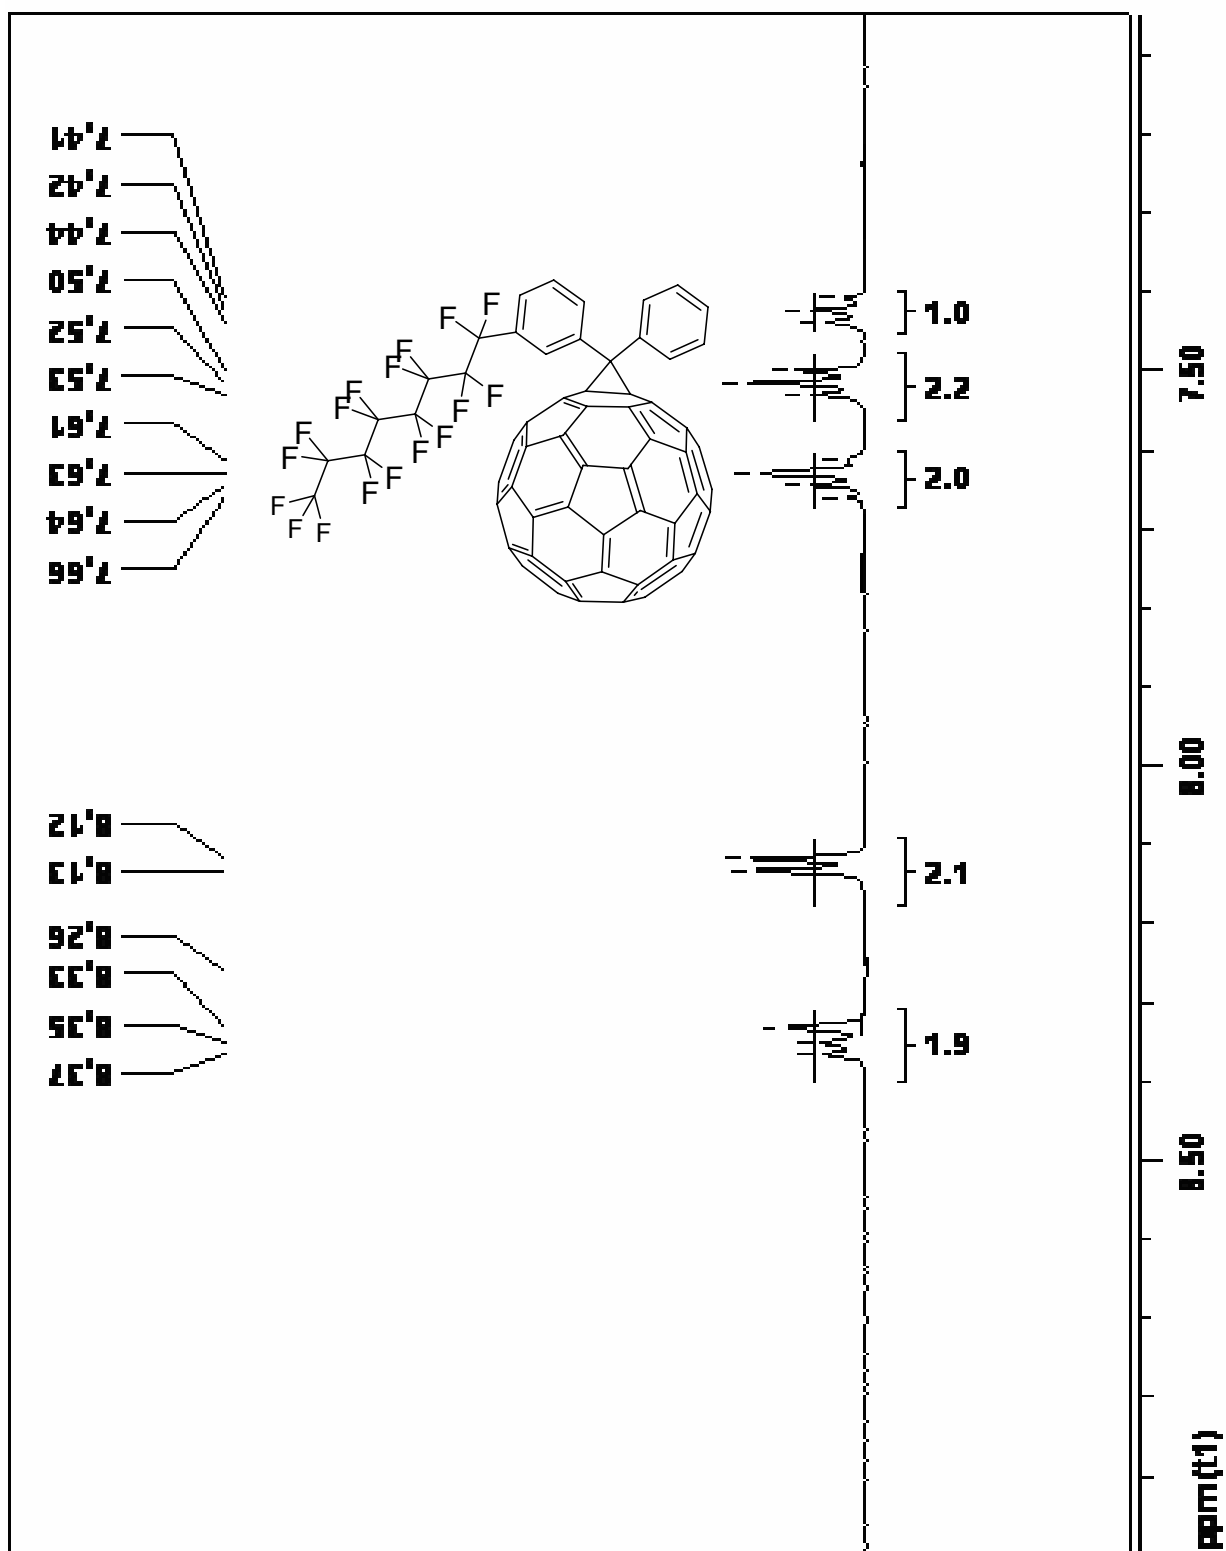

<sup>13</sup>CNMR Spectra of Compound 2

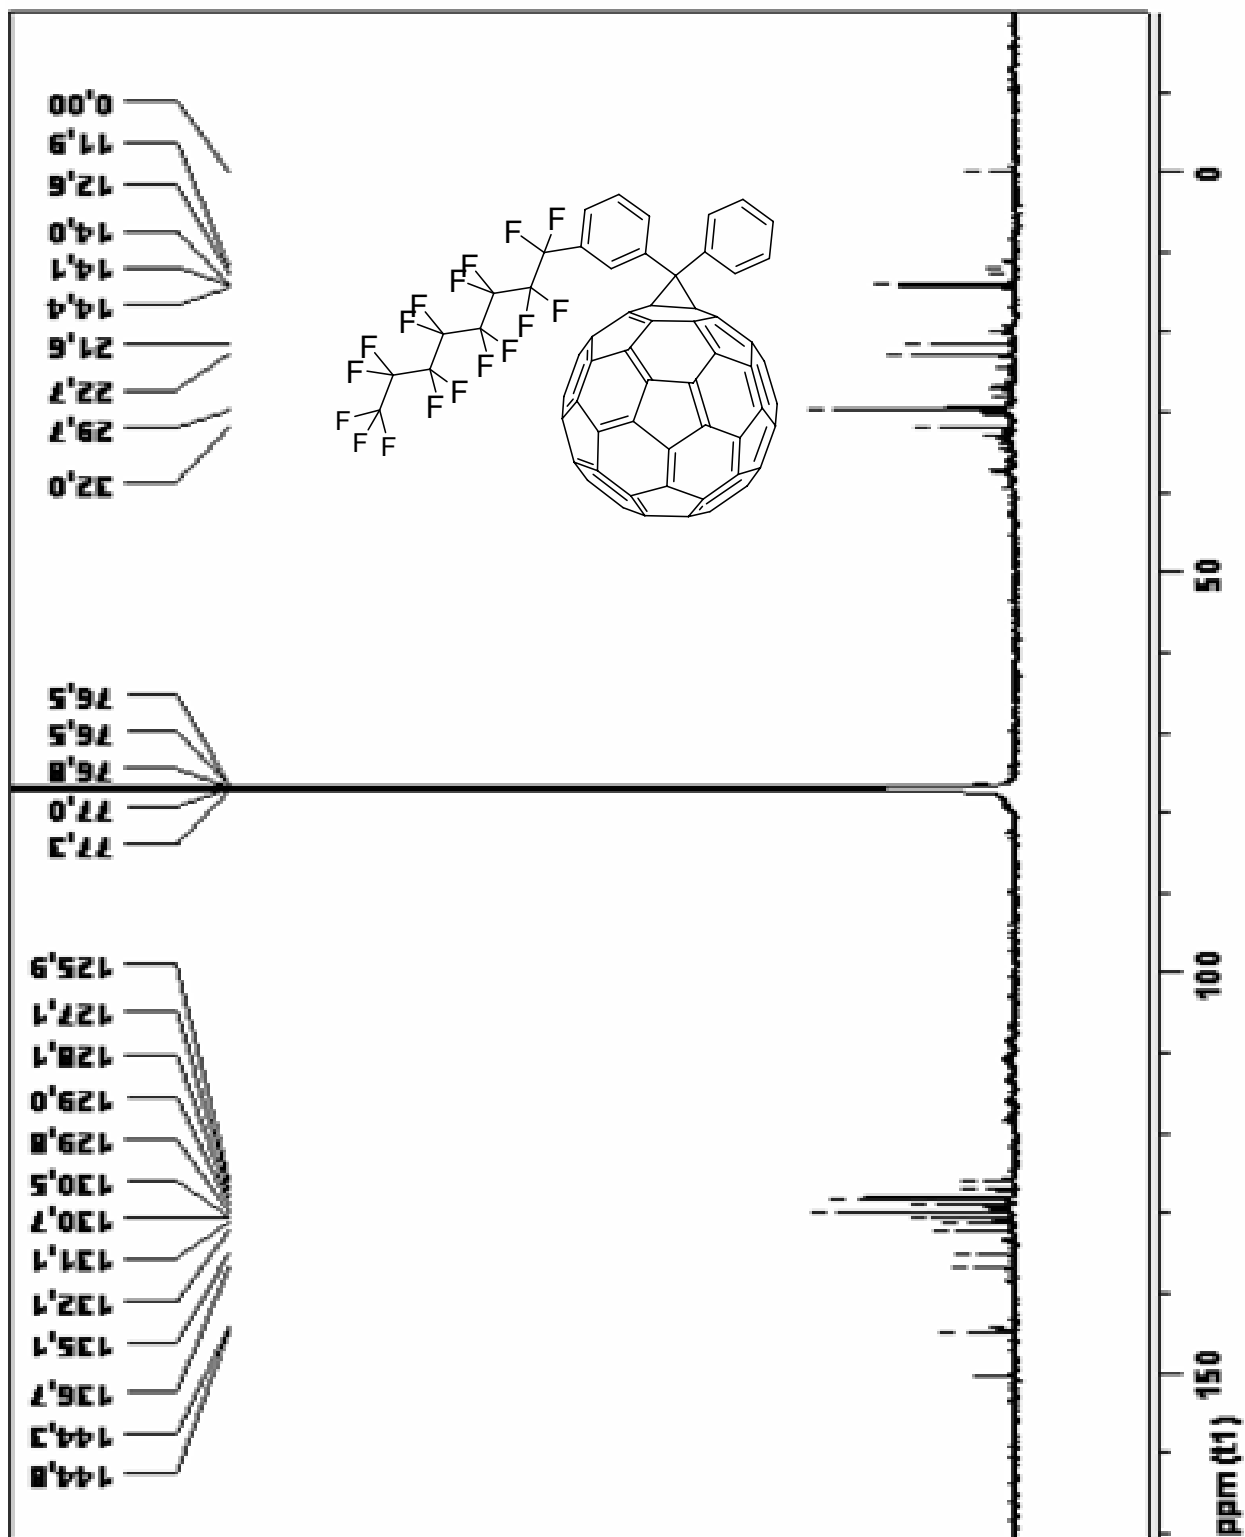

<sup>19</sup>F NMR Spectra of Compound 2

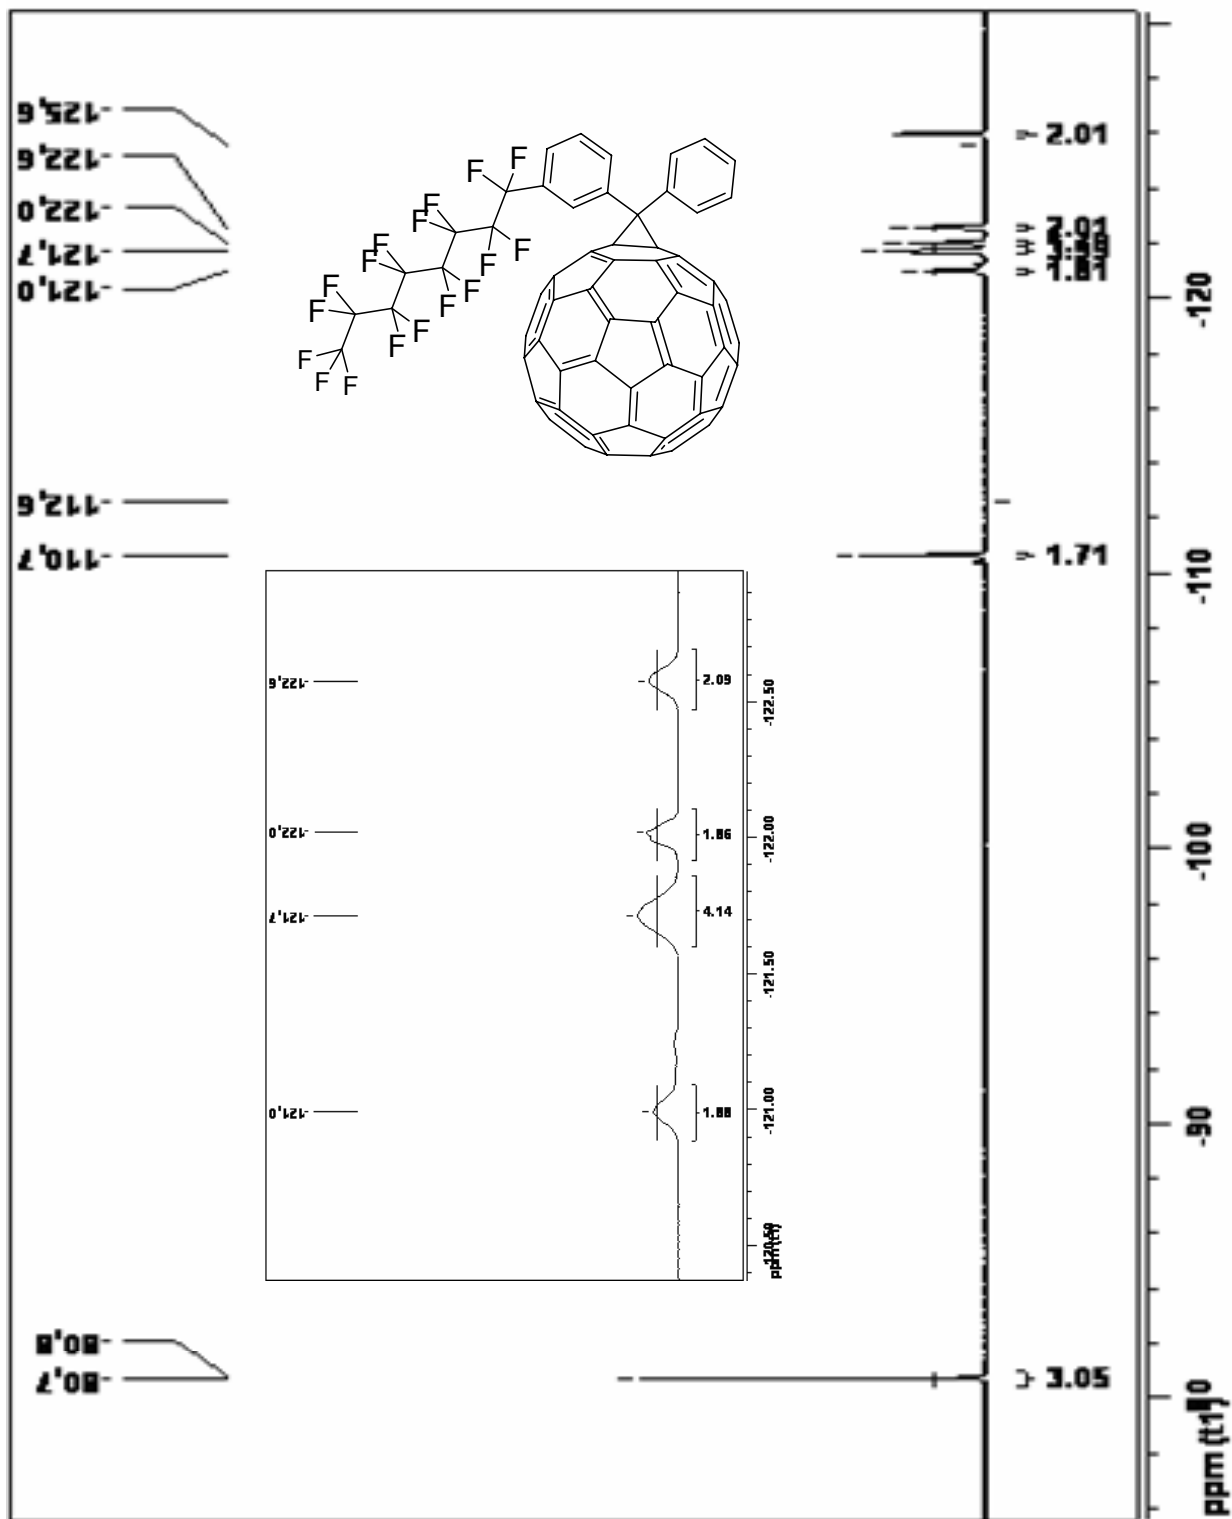

MALDI - TOF of Compound 2

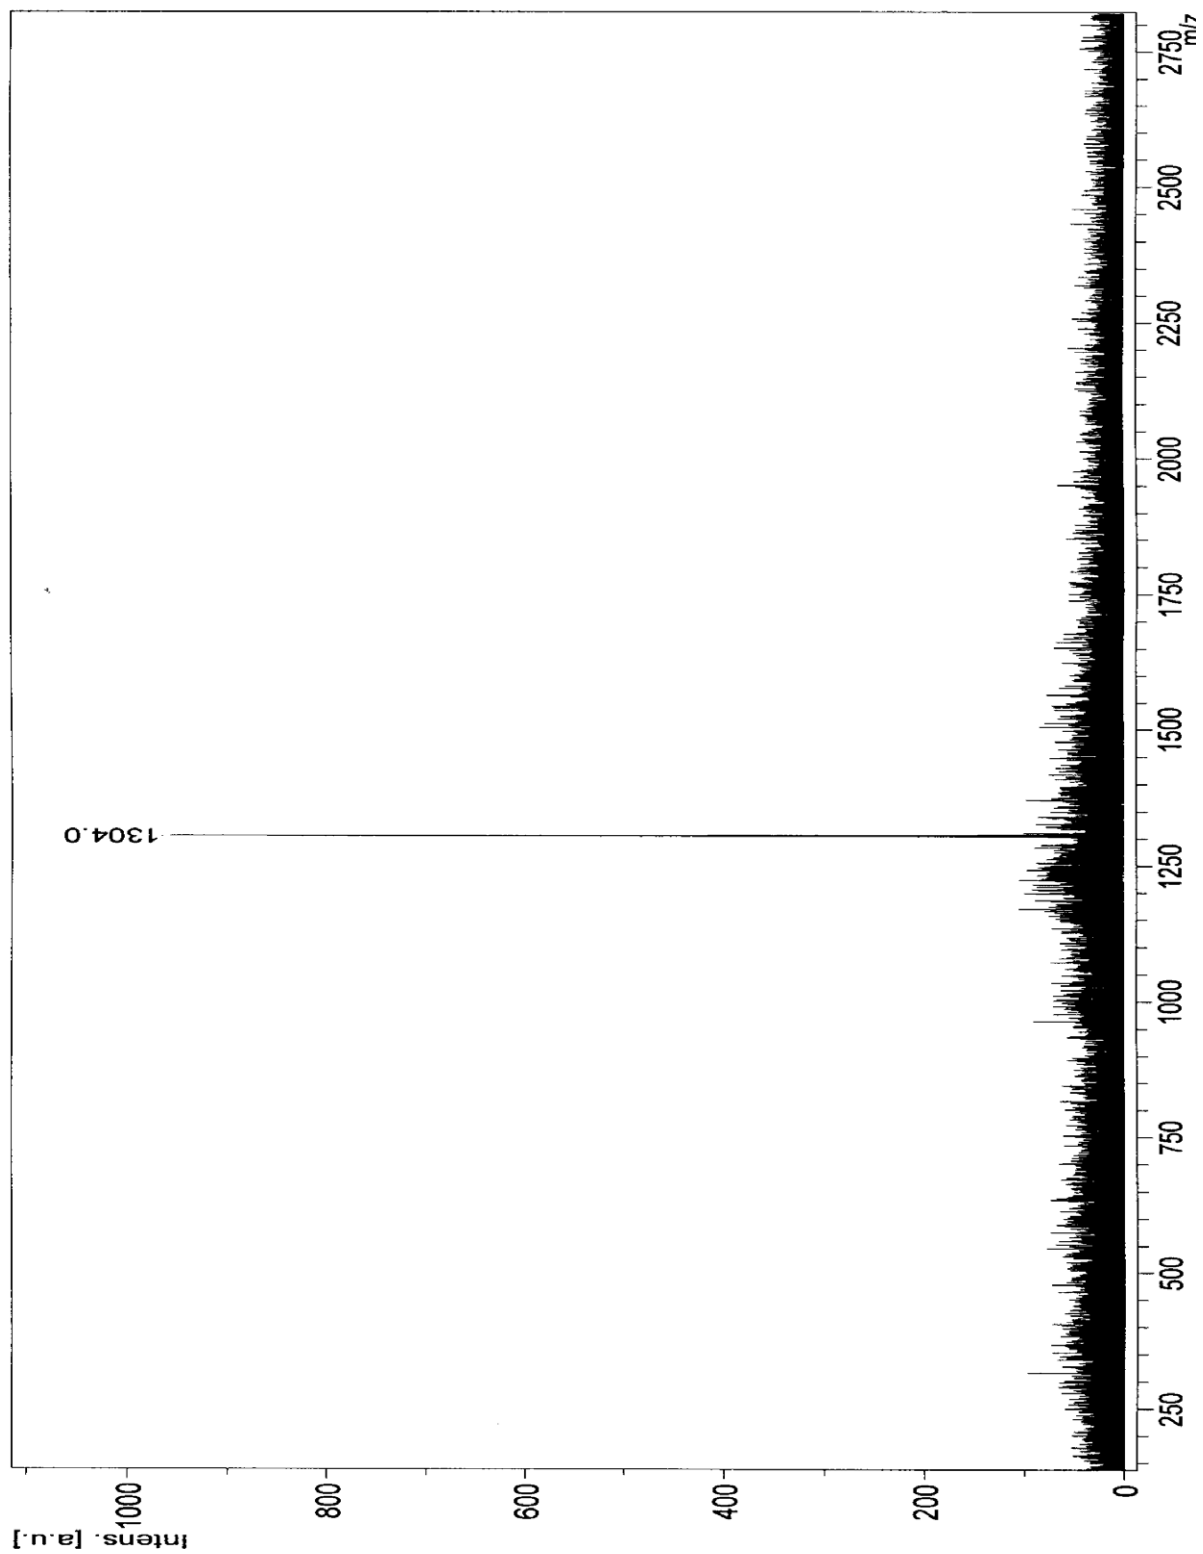

MALDI - TOF of Compound 1

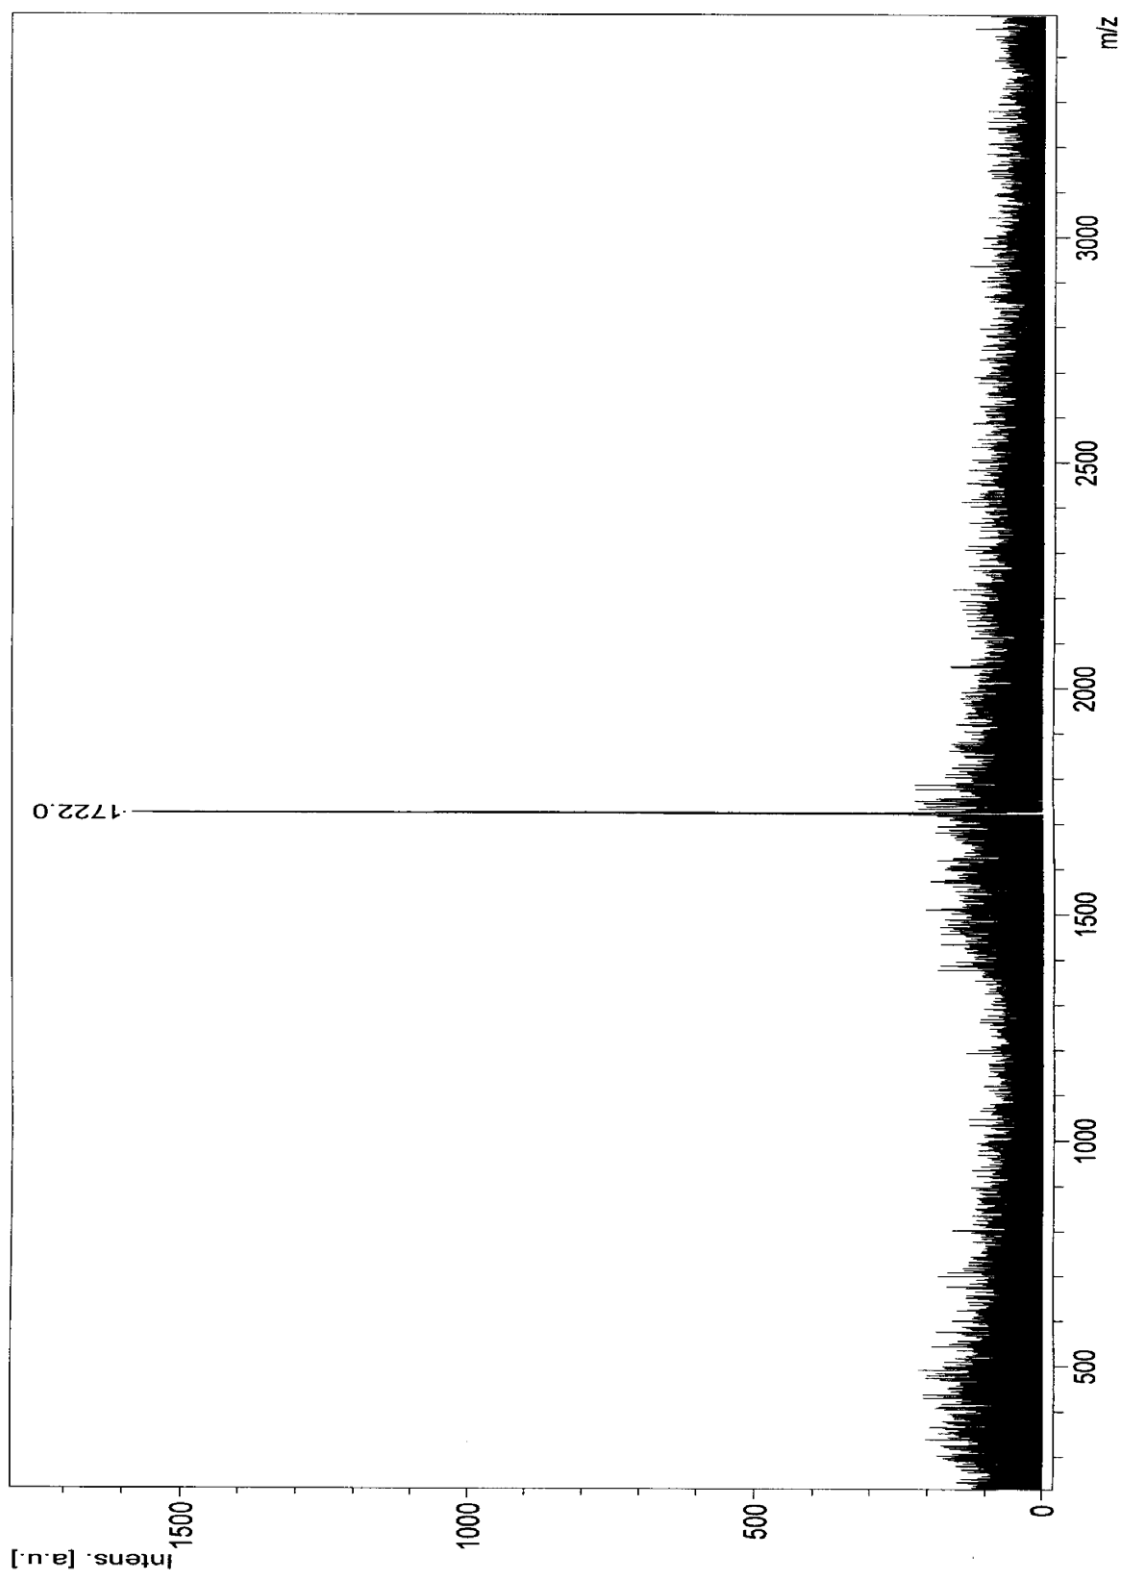

Supplement: b823336e.pdf [file b823336e.pdf]
